# Supplementary material for: Base catalysed intermolecular cyclisation of N-protected o-amino benzaldehyde/acetophenone with phosphorus/sulphur based allenes: facile synthesis of substituted quinolines
Source: Royal Society of Chemistry journal article supplement (doi:10.1039/c6ob00259e), 2016-01-01
Supplement: c6ob00259e1.pdf [file c6ob00259e1.pdf]

## **Base catalysed intermolecular cyclisation of *N*-protected *o*-amino benzaldehyde/ acetophenone with phosphorus/ sulphur based allenes: Facile synthesis of substituted quinolines**

Mandala Anitha, G. Gangadhararao and K. C. Kumara Swamy\*

School of Chemistry, University of Hyderabad, Hyderabad -500046, Telangana, India. Fax:  
(+91)-40-23012460

e-mail: [kckssc@uohyd.ac.in](mailto:kckssc@uohyd.ac.in), [kckssc@yahoo.com](mailto:kckssc@yahoo.com)

|          |                                                                                                        |               |
|----------|--------------------------------------------------------------------------------------------------------|---------------|
| <b>1</b> | <b>A plausible pathway for the formation of phosphono quinoline A and phosphorus free quinolinones</b> | <b>S2</b>     |
| <b>2</b> | <b>Figure S1. Molecular structure of compound 26</b>                                                   | <b>S3</b>     |
| <b>3</b> | <b>Crystal data for the compounds</b>                                                                  | <b>S3-S4</b>  |
| <b>4</b> | <b><sup>1</sup>H and <sup>13</sup>C NMR spectra for all new compounds (Figure S2-S77)</b>              | <b>S6-S43</b> |

## 1. Plausible pathway for the formation of phosphorus-free quinolinones 18-20, anisyl phosphonate 21, and phosphono-quinoline A

Formation of compound **A** can be explained *via* compound **5'** (R = Ph, R<sup>1</sup> = Me; Scheme S1) similar to **5** (cf. Scheme 5) may be involved. In the presence of liberated H<sub>2</sub>O, **5'** leads to **X** after benzoic acid elimination followed by abstraction of proton, which may lead to product **A**.<sup>15</sup> Formation of phosphorus-free quinolinone **18** and anisyl phosphonate **21** looks odd, but we presume that intermediate **X** that is analogous to compound **A** may be involved. Compounds **19** and **20** are formed in a similar manner. As mentioned in the main text, we concentrated upon quinolones and hence did not investigate this part further.

**Scheme S1. Possible pathway for the formation of compounds A, X and 18-21**

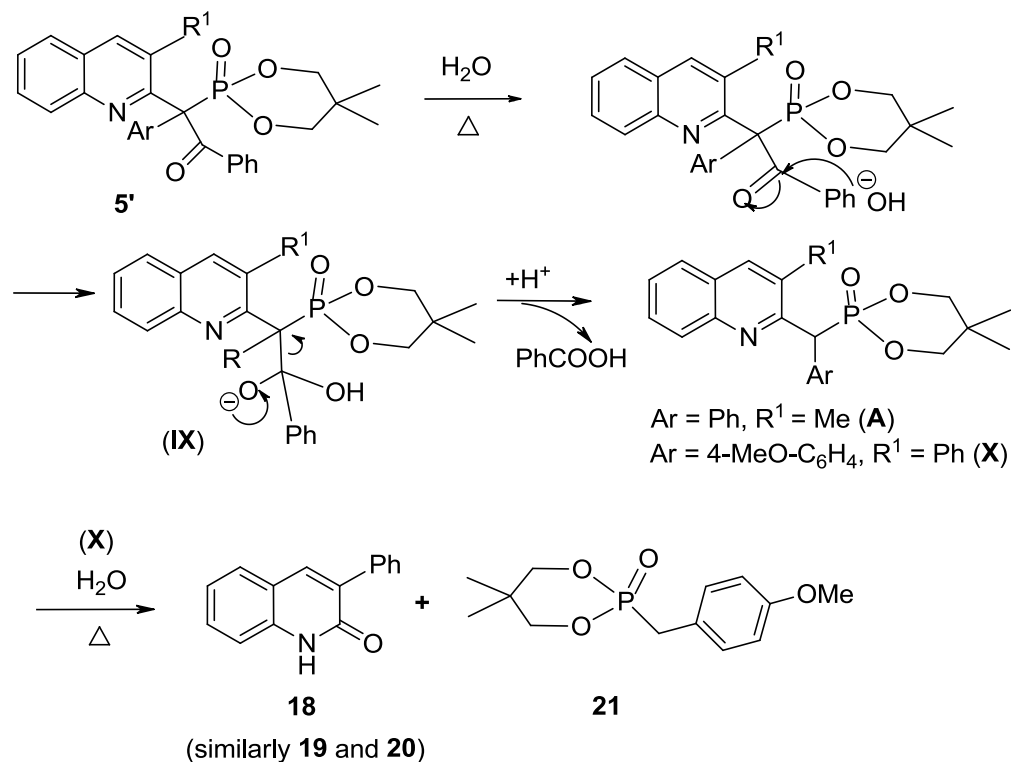

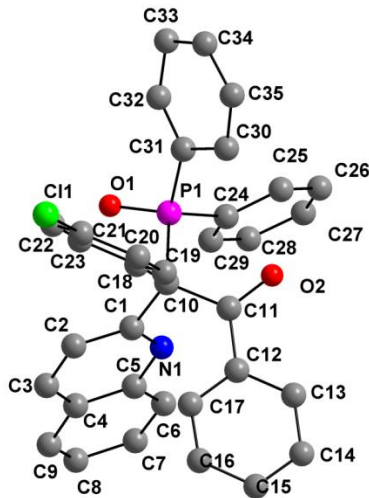

**Figure S1.** Molecular structure of compound **26**. Hydrogen atoms are omitted for clarity. Selected bond parameters: N1-C1 1.31(5), C1-C10 1.54(6), C10-C11 1.53(6), C18-C10 1.55(6), P1-C10 1.91(4), C1-C2 1.40(6), O2-C11 1.22(5) (Å).

### X-ray Data.

X-ray data for compounds **5**, **18**, **19**, **26**, **31** and **33** were collected using Mo  $K_{\alpha}$  ( $\lambda = 0.71073$  Å) and for compound **9**, by Cu  $K_{\alpha}$  radiation. The structures were solved and refined by standard methods as mentioned in the main text. The CCDC numbers are 1447739-1447745.

### Compound 5.

Colorless block,  $C_{28}H_{26}NO_4P$ ,  $M = 471.47$ , Monoclinic, Space group  $P2(1)/n$ ,  $a = 12.282(3)$ ,  $b = 8.9370(18)$ ,  $c = 22.179(4)$  Å,  $\beta = 92.60(3)$ ,  $V = 2431.9(8)$  Å<sup>3</sup>,  $Z = 4$ ,  $\mu = 0.148$  mm<sup>-1</sup>, data/restraints/parameters: 4288/0/309, R indices ( $I > 2\sigma(I)$ ):  $R1 = 0.0573$ ,  $wR2$  (all data) = 0.1337. CCDC No. 1447739.

### Compound 9.

Colorless block,  $C_{29}H_{28}NO_4P$ ,  $M = 485.49$ , Triclinic, Space group  $P-1$ ,  $a = 10.4790(9)$ ,  $b = 10.8907(9)$ ,  $c = 12.8985(9)$  Å,  $\alpha = 68.115(7)$ ,  $\beta = 68.507(7)$ ,  $\gamma = 89.099(7)^{\circ}$ ,  $V = 1258.45(17)$  Å<sup>3</sup>,

$Z = 2$ ,  $\mu = 1.255 \text{ mm}^{-1}$ , data/restraints/parameters: 4810/0/319, R indices ( $I > 2\sigma(I)$ ):  $R1 = 0.0463$ ,  $wR2$  (all data) = 0.1358. CCDC No. 1447740.

### **Compound 18.**

Colorless block,  $C_{15}H_{11}NO$ ,  $M = 221.25$ , Monoclinic, Space group  $C2/c$ ,  $a = 17.8590(16)$ ,  $b = 5.8124(4)$ ,  $c = 21.742(2) \text{ \AA}$ ,  $\beta = 106.101(10)$ ,  $V = 2168.3(3) \text{ \AA}^3$ ,  $Z = 8$ ,  $\mu = 0.085 \text{ mm}^{-1}$ , data/restraints/parameters: 1902/0/158, R indices ( $I > 2\sigma(I)$ ):  $R1 = 0.0409$ ,  $wR2$  (all data) = 0.1139. CCDC No. 1447741.

### **Compound 19.**

Colorless block,  $C_{15}H_{10}ClNO$ ,  $M = 255.69$ , Monoclinic, Space group  $C2/c$ ,  $a = 17.482(4)$ ,  $b = 5.9043(13)$ ,  $c = 23.251(5) \text{ \AA}$ ,  $\beta = 100.505(3)^\circ$ ,  $V = 2359.7(9) \text{ \AA}^3$ ,  $Z = 8$ ,  $\mu = 0.308 \text{ mm}^{-1}$ , data/restraints/parameters: 2057/0/167, R indices ( $I > 2\sigma(I)$ ):  $R1 = 0.0479$ ,  $wR2$  (all data) = 0.1272. CCDC No. 1447742.

### **Compound 26.**

Colorless block,  $C_{35}H_{25}ClNO_2P$ ,  $M = 557.98$ , Monoclinic, Space group  $P2(1)/c$ ,  $a = 9.6939(19)$ ,  $b = 21.405(4)$ ,  $c = 27.668(6) \text{ \AA}$ ,  $\beta = 80.83(3)^\circ$ ,  $V = 5668(2) \text{ \AA}^3$ ,  $Z = 8$ ,  $\mu = 0.225 \text{ mm}^{-1}$ , data/restraints/parameters: 9976/26/721, R indices ( $I > 2\sigma(I)$ ):  $R1 = 0.1094$ ,  $wR2$  (all data) = 0.2583. The quality of data was only moderate, and disorder was found at two carbon atoms (C41 and C42), However, the structure could be readily discerned. CCDC No. 1447743.

### **Compound 31.**

Colorless block,  $C_{30}H_{22}ClNO_3S$ ,  $M = 512.01$ , Triclinic, Space group  $P-1$ ,  $a = 10.626(2)$ ,  $b = 11.358(2)$ ,  $c = 21.635(4) \text{ \AA}$ ,  $\alpha = 104.76(3)$ ,  $\beta = 91.46(3)$ ,  $\gamma = 90.01(3)^\circ$ ,  $V = 2524.1(9) \text{ \AA}^3$ ,  $Z = 4$ ,  $\mu = 0.267 \text{ mm}^{-1}$ , data/restraints/parameters: 5334/0/651, R indices ( $I > 2\sigma(I)$ ):  $R1 = 0.0836$ ,  $wR2$  (all data) = 0.2541. CCDC No. 1447744.

### Compound 33

Colorless block,  $C_{29}H_{32}NO_6PS$ ,  $M = 553.59$ , Monoclinic, Space group  $C2/c$ ,  $a = 34.280(3)$ ,  $b = 17.618(13)$ ,  $c = 25.486(4)$  Å,  $\beta = 131.39(3)^\circ$ ,  $V = 11548(2)$  Å<sup>3</sup>,  $Z = 16$ ,  $\mu = 0.209$  mm<sup>-1</sup>, data/restraints/parameters: 9448/0/696, R indices ( $I > 2\sigma(I)$ ):  $R1 = 0.0617$ ,  $wR2$  (all data) = 0.1823. CCDC No. 1447745.

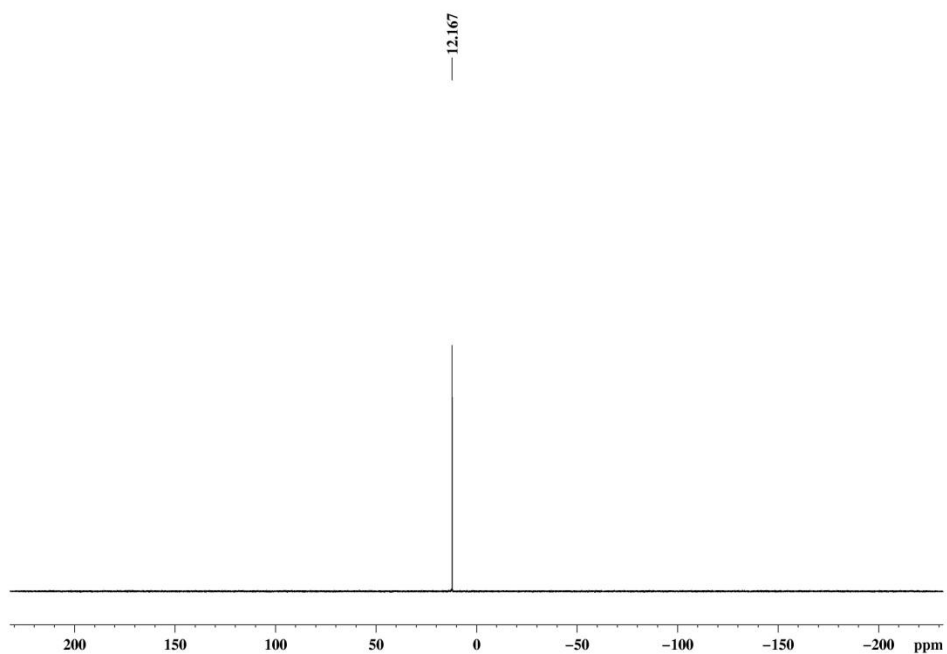

Figure S2.  $^{31}\text{P}$  NMR spectrum of compound **5**

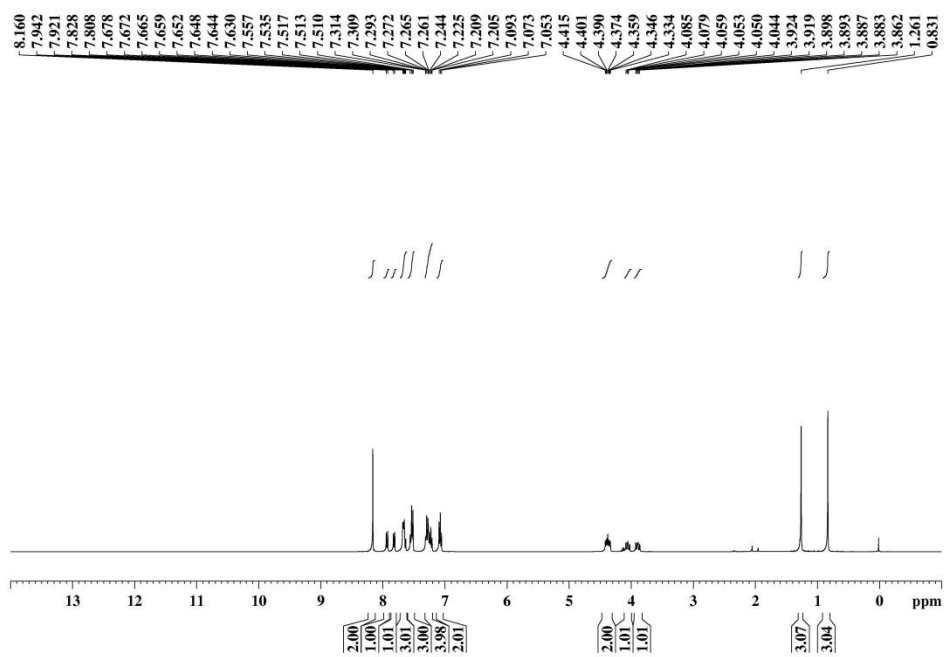

Figure S3.  $^1\text{H}$  NMR spectrum of compound **5**

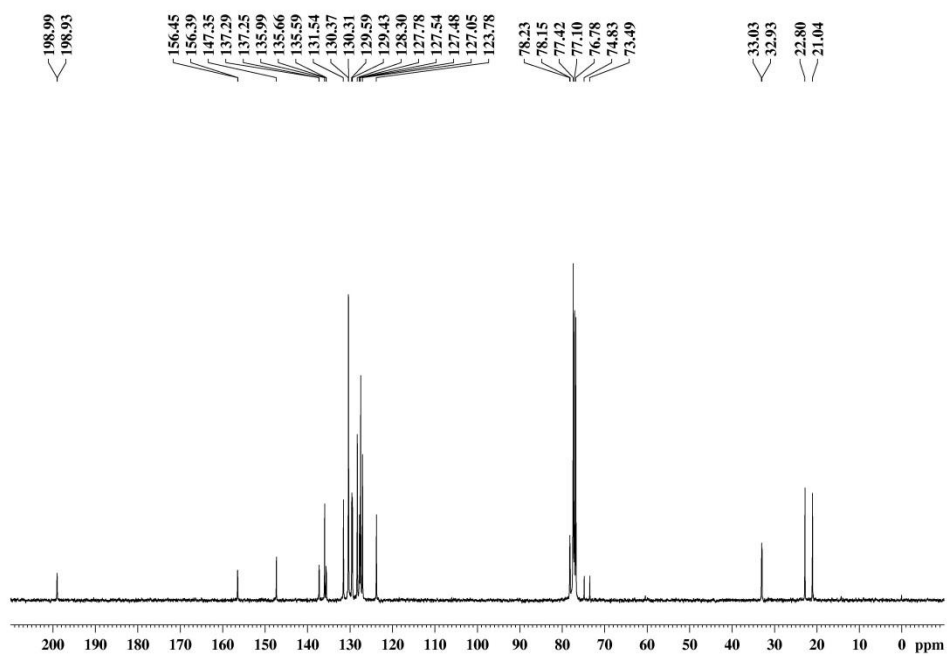

**Figure S4.**  $^{13}\text{C}$  NMR spectrum of compound **5**

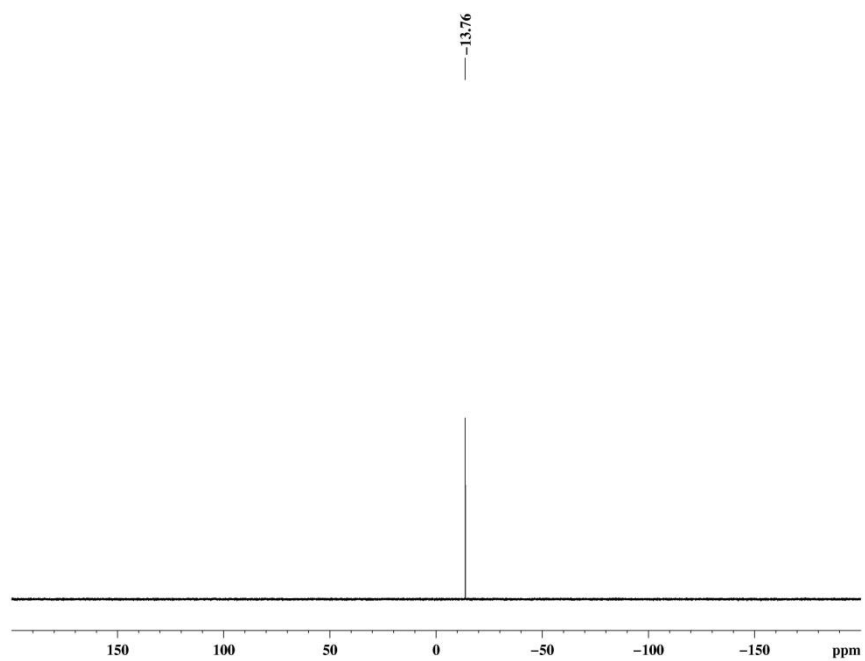

**Figure S5.**  $^{31}\text{P}$  NMR spectrum of compound **6**

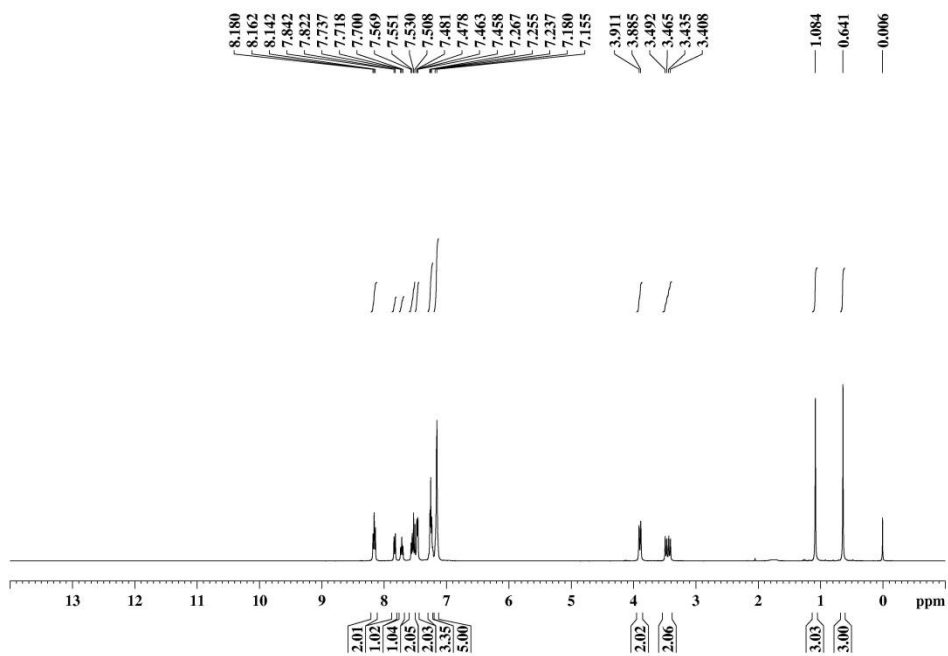

Figure S6.  $^1\text{H}$  NMR spectrum of compound **6**

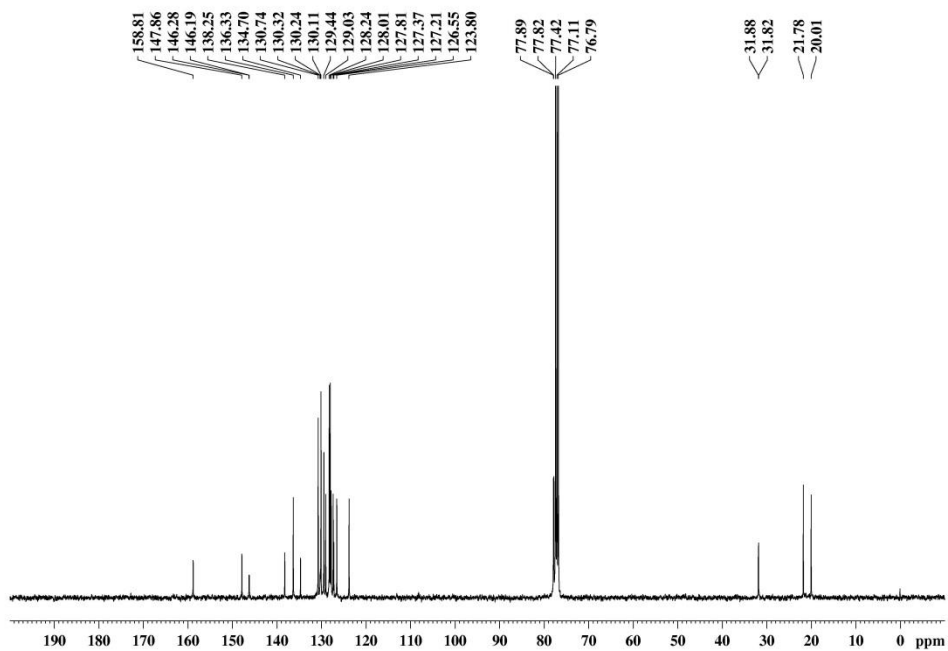

Figure S7.  $^{13}\text{C}$  NMR spectrum of compound **6**



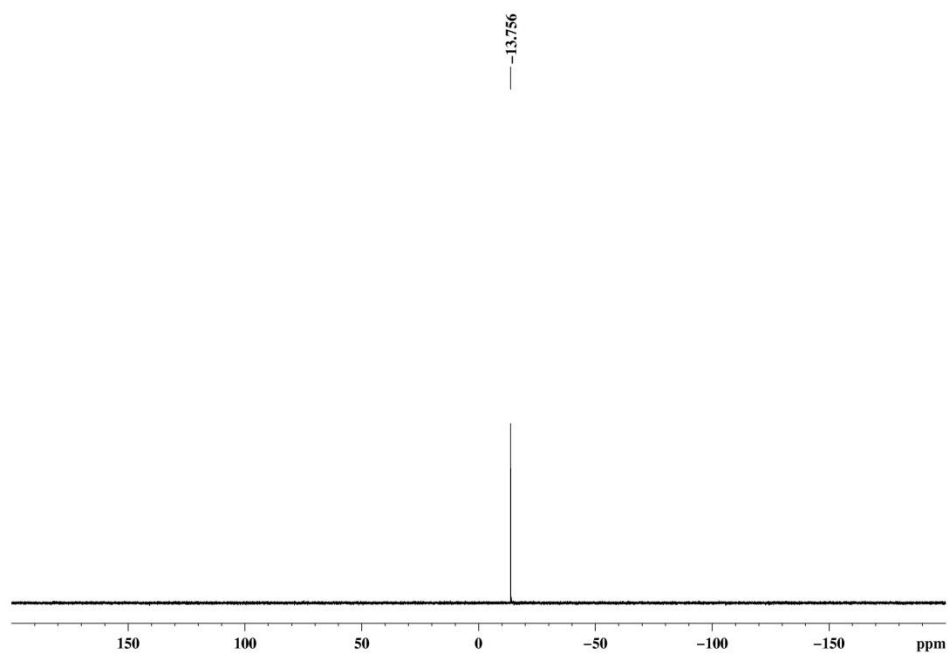

**Figure S8.**  $^{31}\text{P}$  NMR spectrum of compound **7**

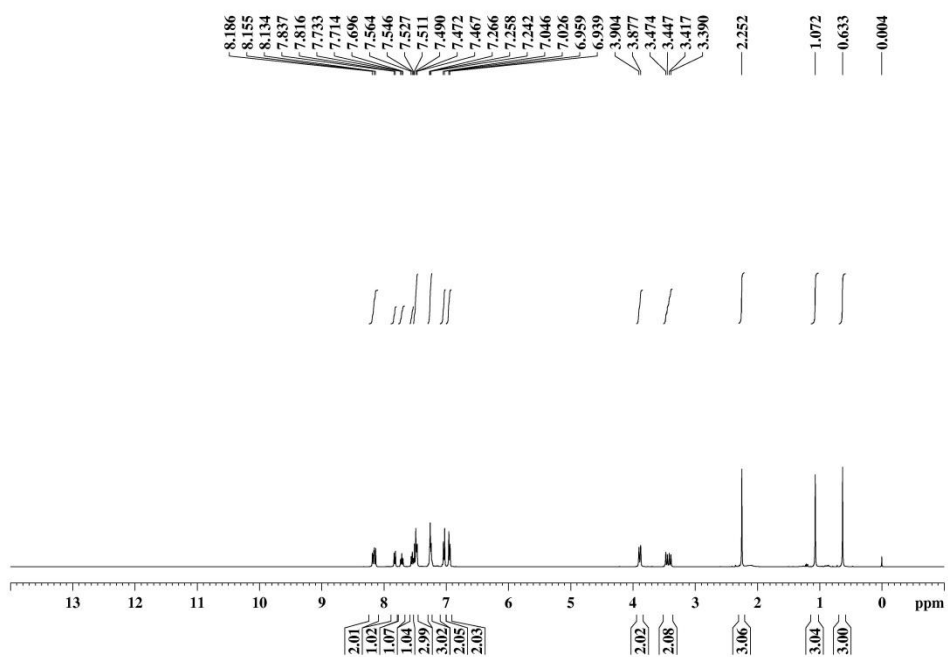

**Figure S9.**  $^1\text{H}$  NMR spectrum of compound **7**

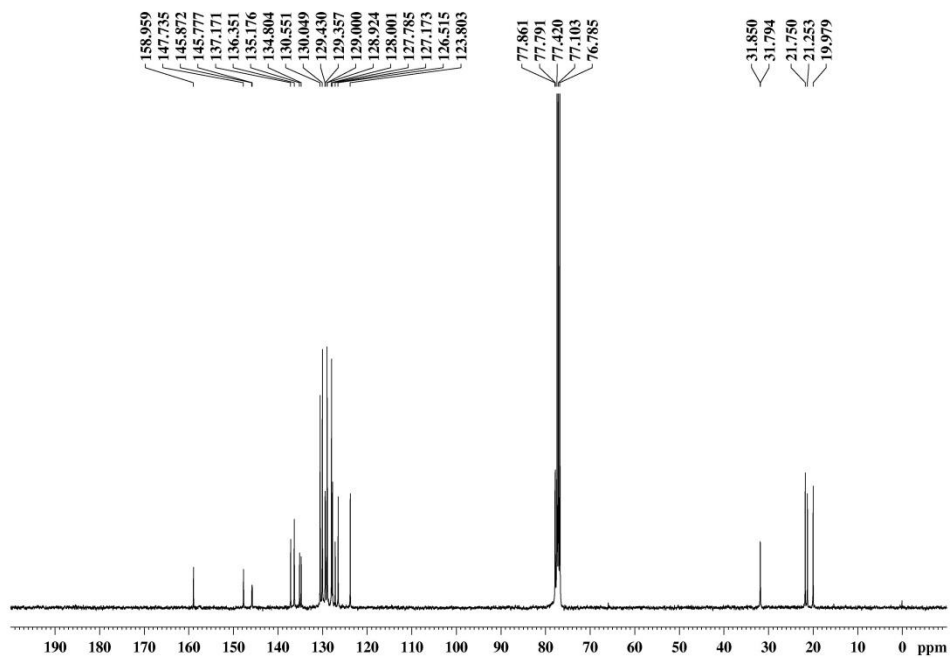

Figure S10.  $^{13}\text{C}$  NMR spectrum of compound 7

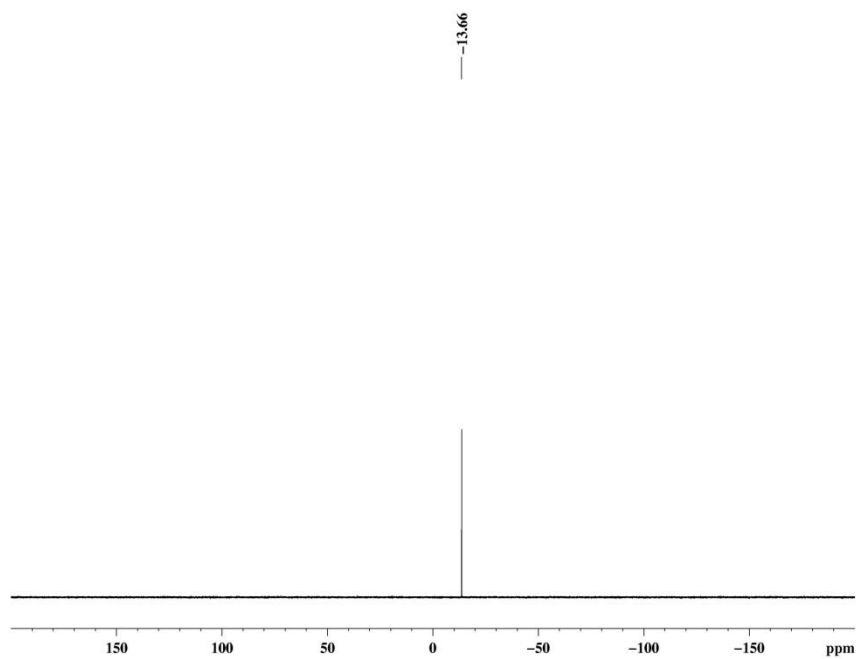

Figure S11.  $^{31}\text{P}$  NMR spectrum of compound 8

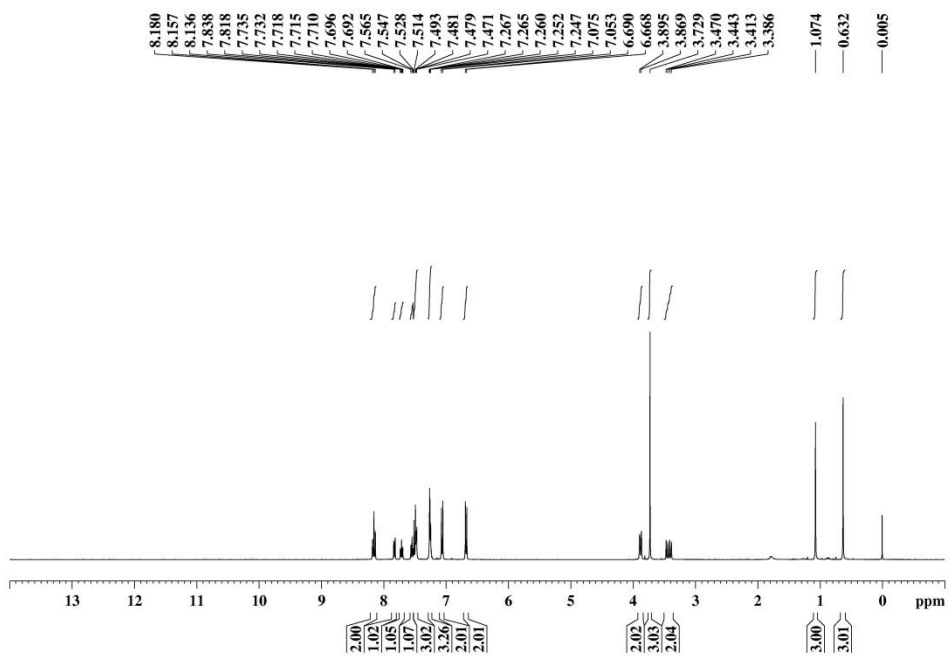

Figure S12.  $^1\text{H}$  NMR spectrum of compound **8**

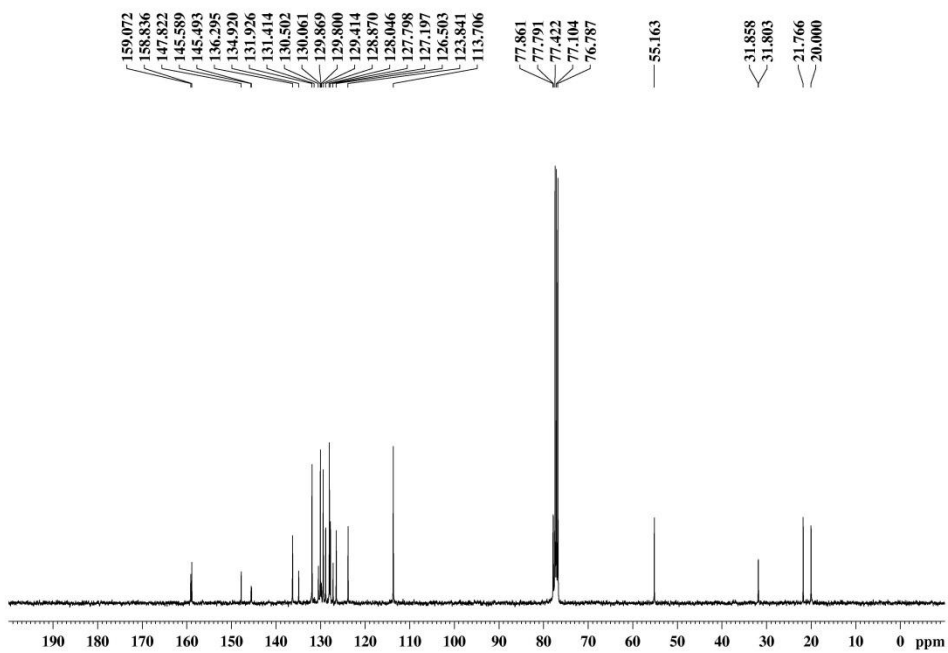

Figure S13.  $^{13}\text{C}$  NMR spectrum of compound **8**

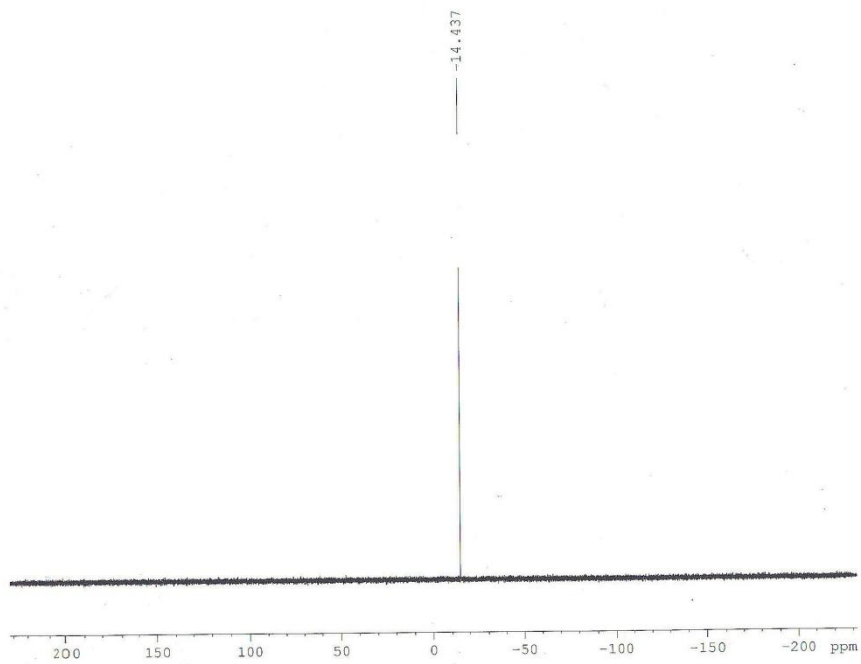

Figure S14.  $^{31}\text{P}$  NMR spectrum of compound **9**

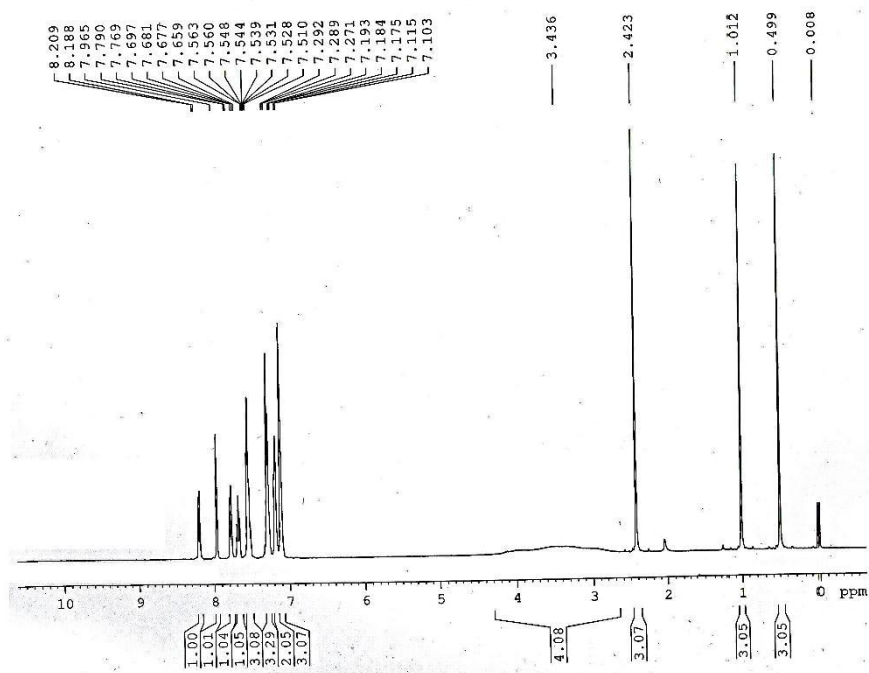

Figure S15.  $^1\text{H}$  NMR spectrum of compound **9**

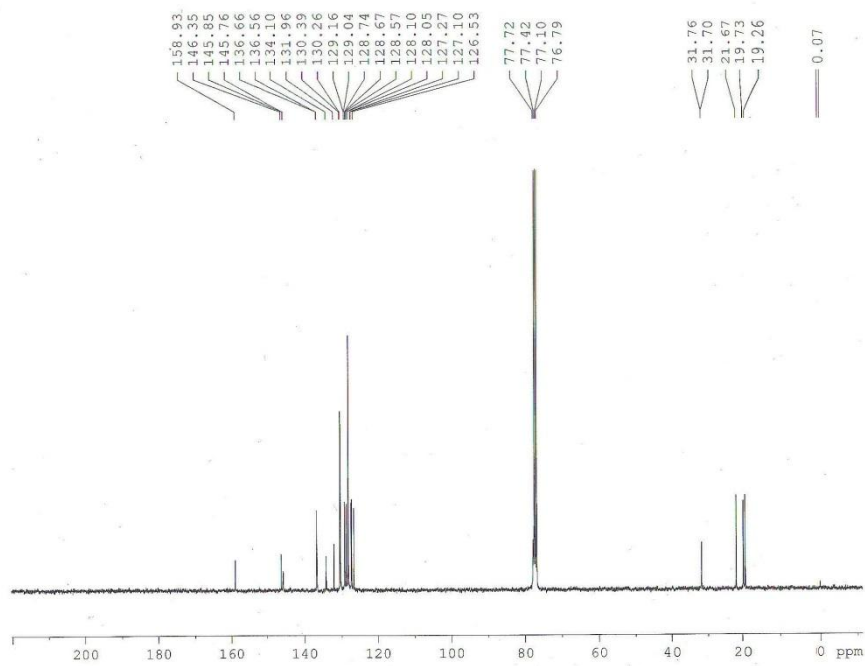

**Figure S16.**  $^{13}\text{C}$  NMR spectrum of compound **9**

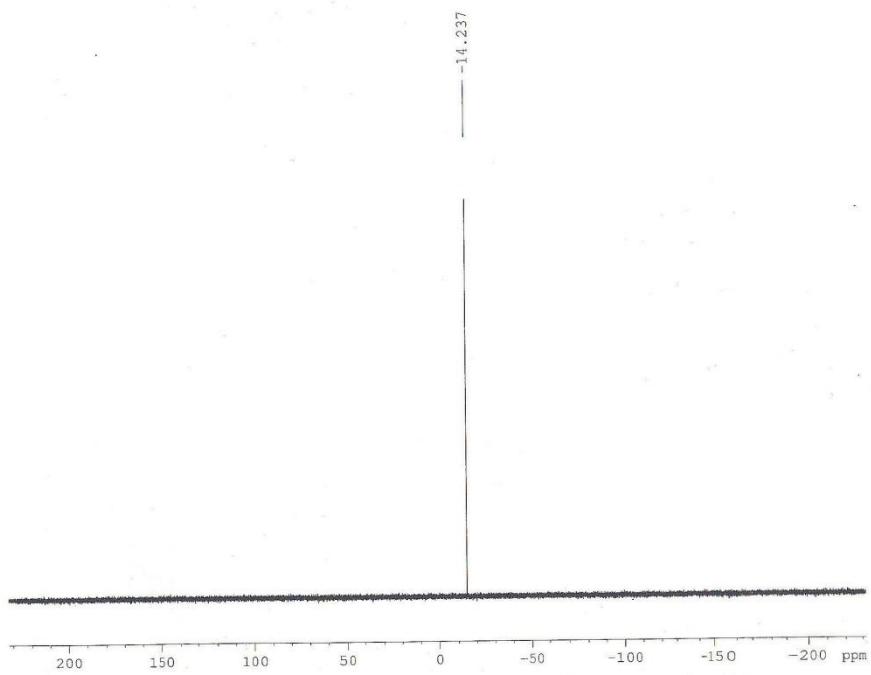

**Figure S17.**  $^{31}\text{P}$  NMR spectrum of compound **10**

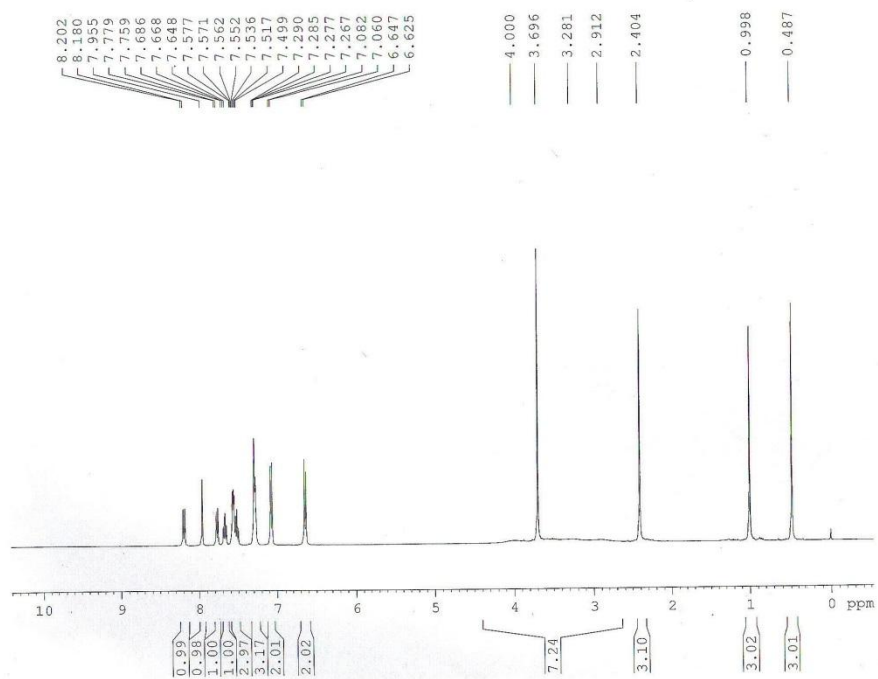

**Figure S18.**  $^1\text{H}$  NMR spectrum of compound **10**

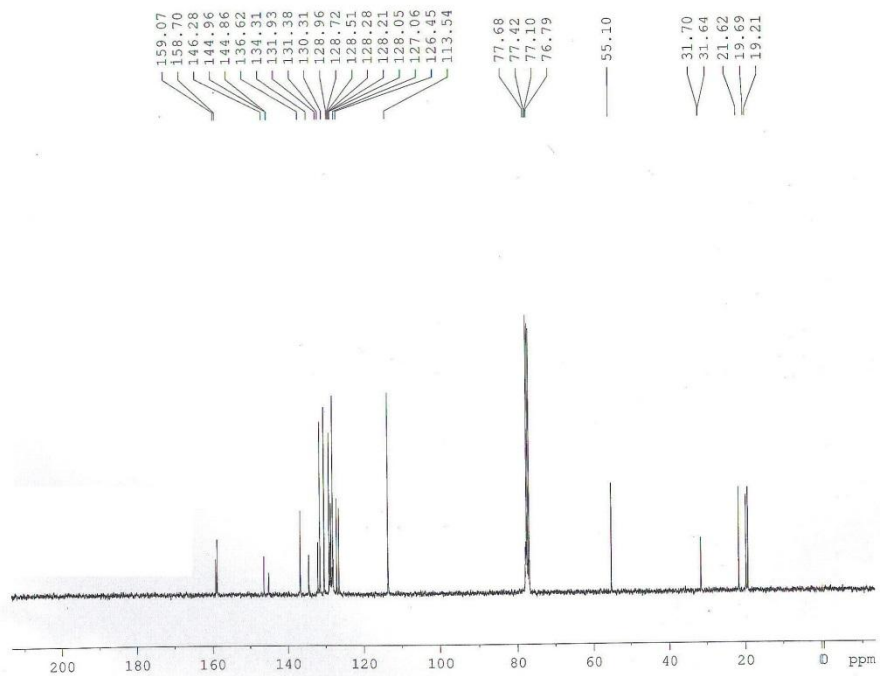

**Figure S19.**  $^{13}\text{C}$  NMR spectrum of compound **10**

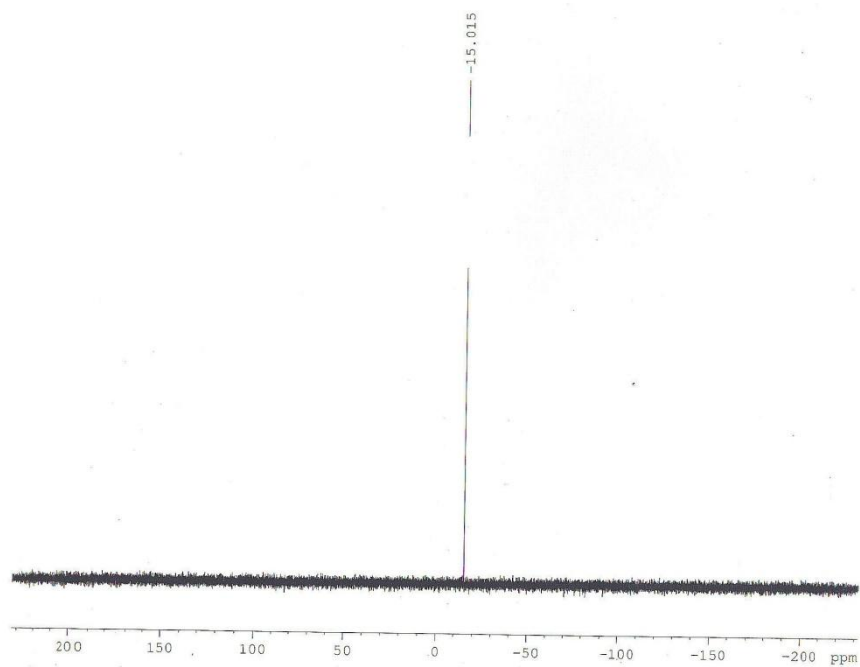

**Figure S20.**  $^{31}\text{P}$  NMR spectrum of compound **11**

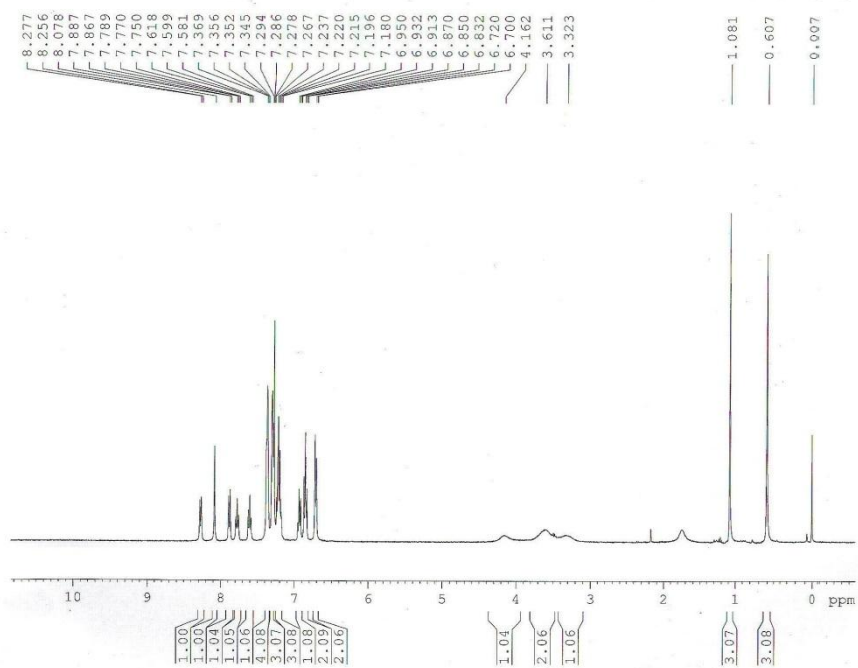

**Figure S21.**  $^1\text{H}$  NMR spectrum of compound **11**

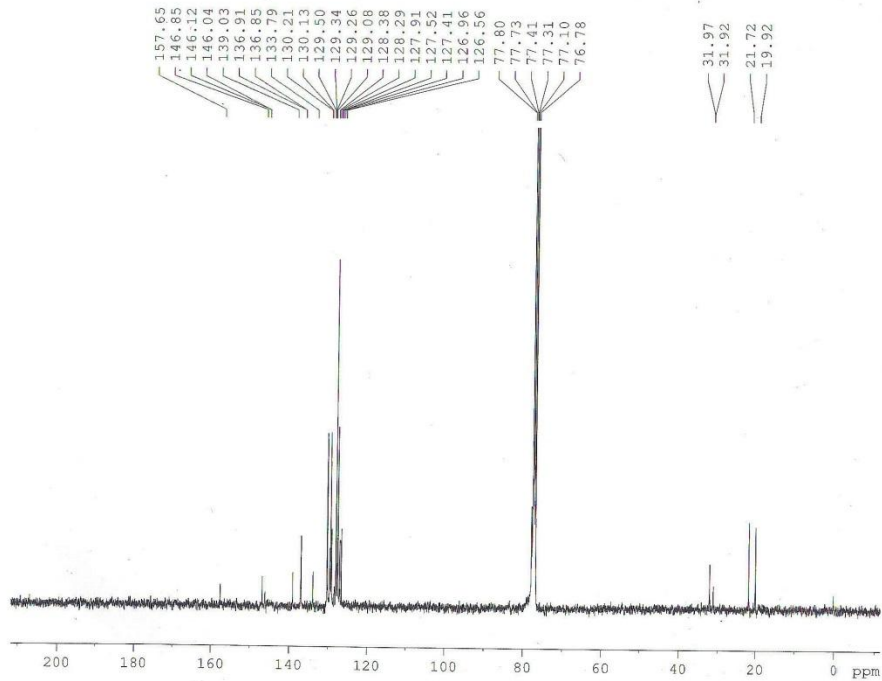

Figure S22.  $^{13}\text{C}$  NMR spectrum of compound 11

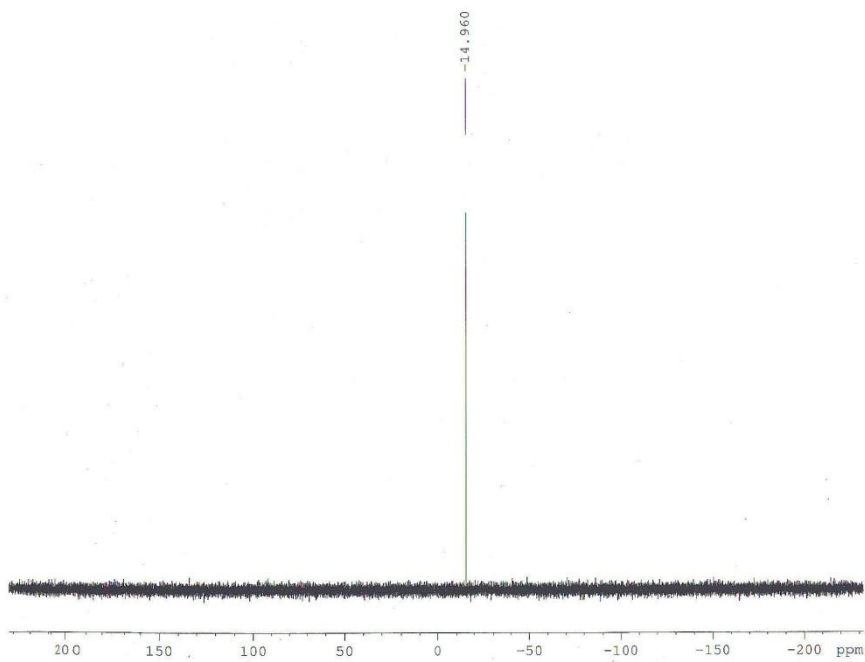

Figure S23.  $^{31}\text{P}$  NMR spectrum of compound 12





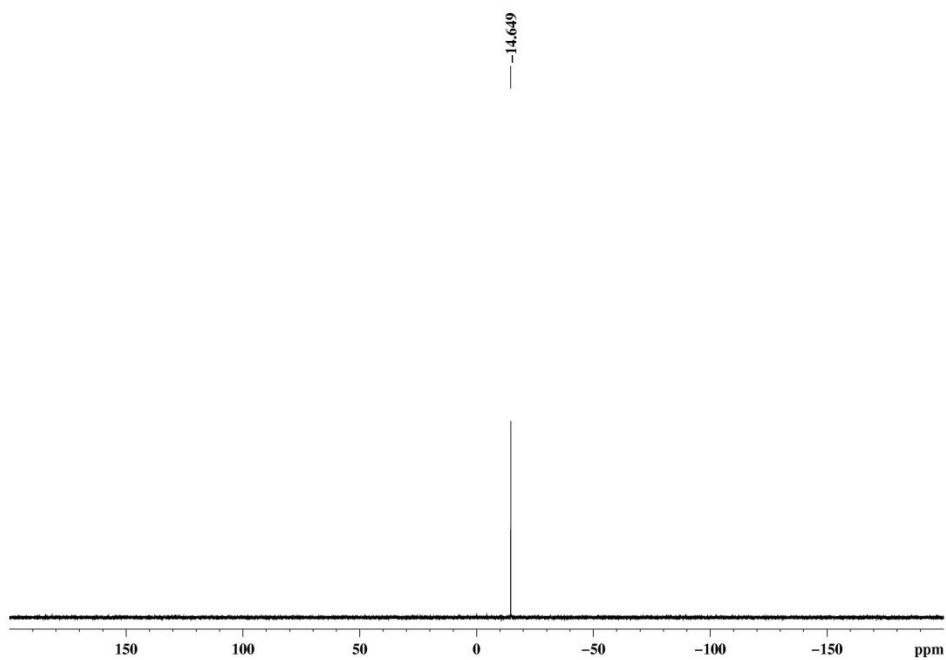

Figure S26.  $^{31}\text{P}$  NMR spectrum of compound **13**

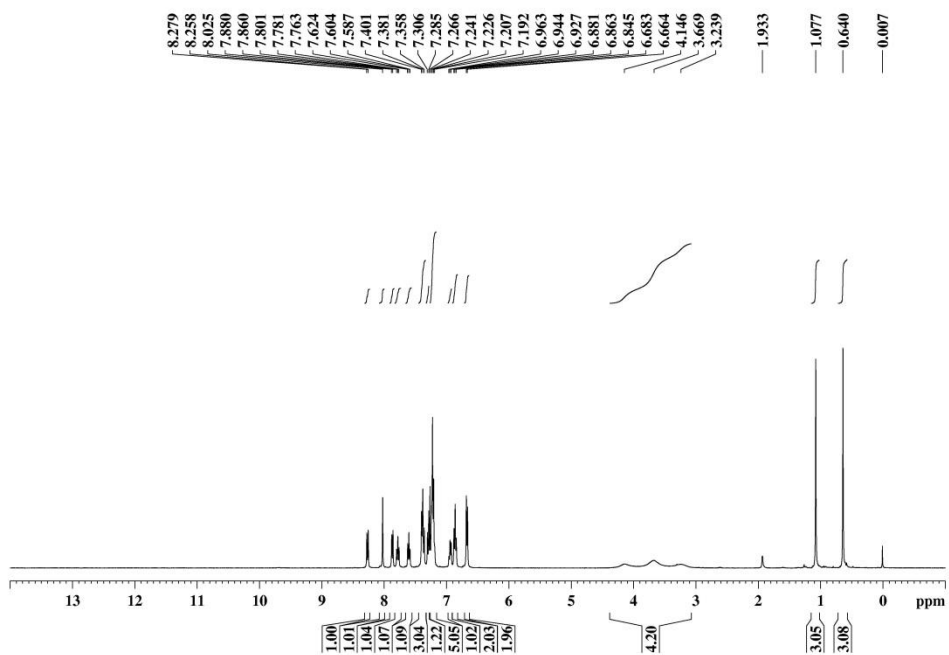

Figure S27.  $^1\text{H}$  NMR spectrum of compound **13**

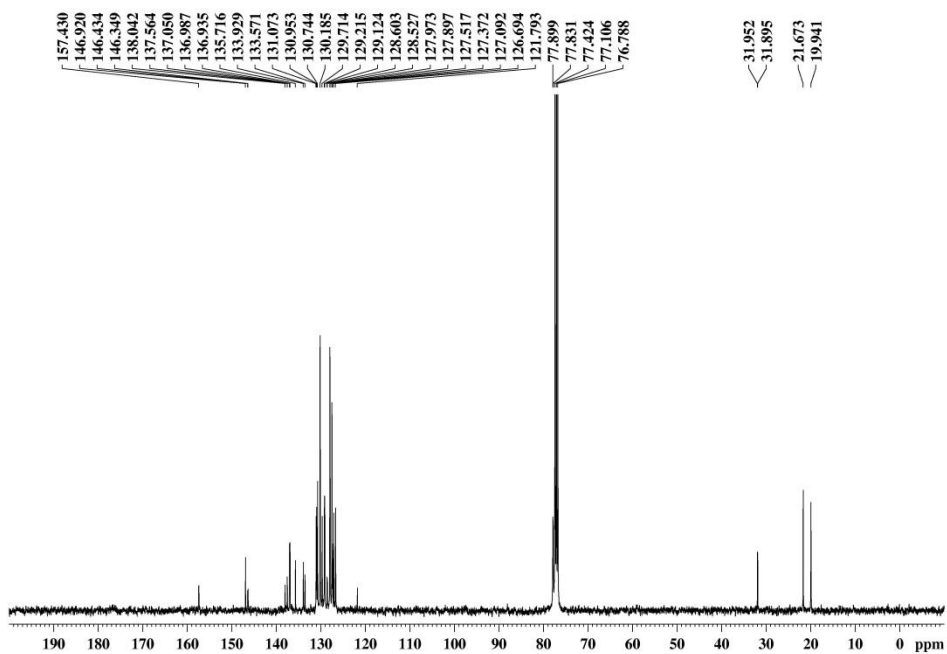

Figure S28.  $^{13}\text{C}$  NMR spectrum of compound 13

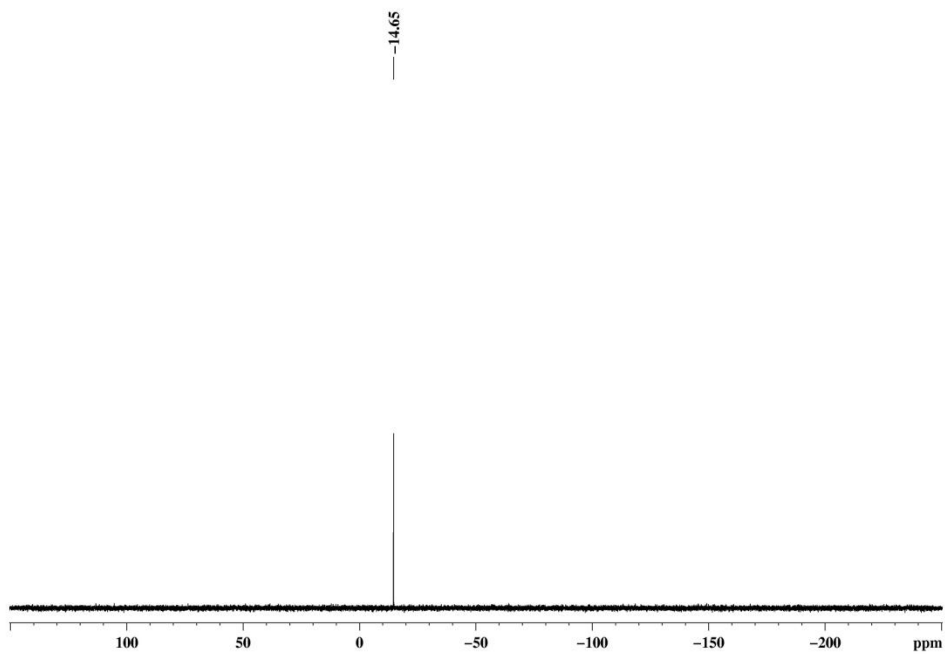

Figure S29.  $^{31}\text{P}$  NMR spectrum of compound 14

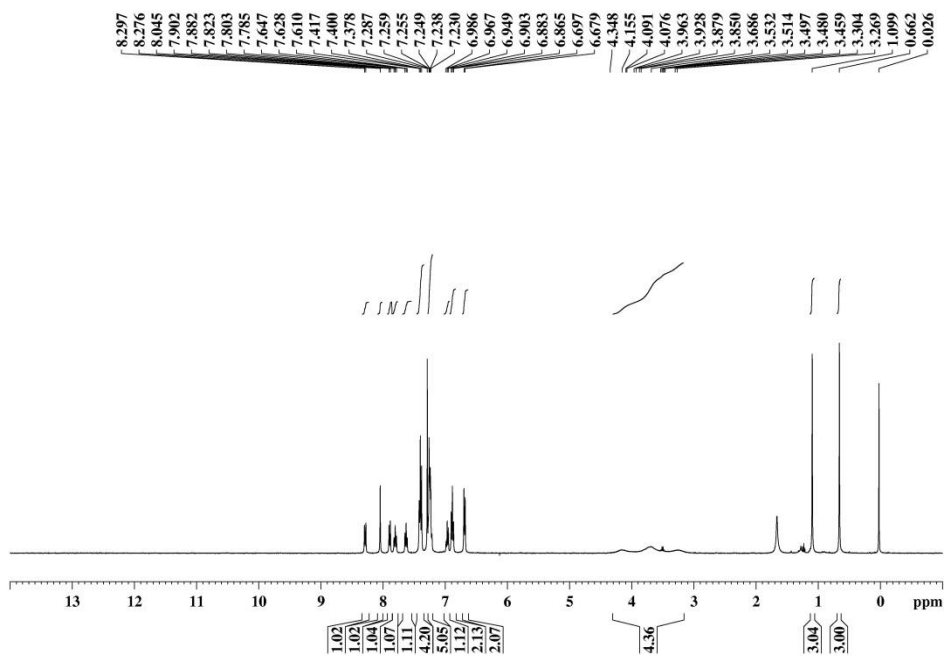

Figure S30.  $^1\text{H}$  NMR spectrum of compound **14**

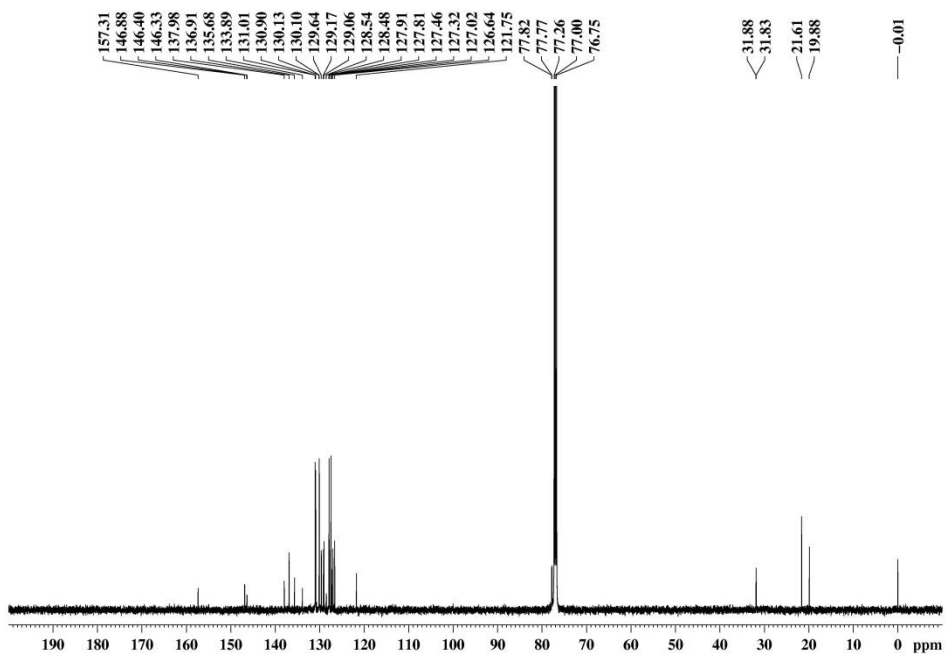

Figure S31.  $^{13}\text{C}$  NMR spectrum of compound **14**

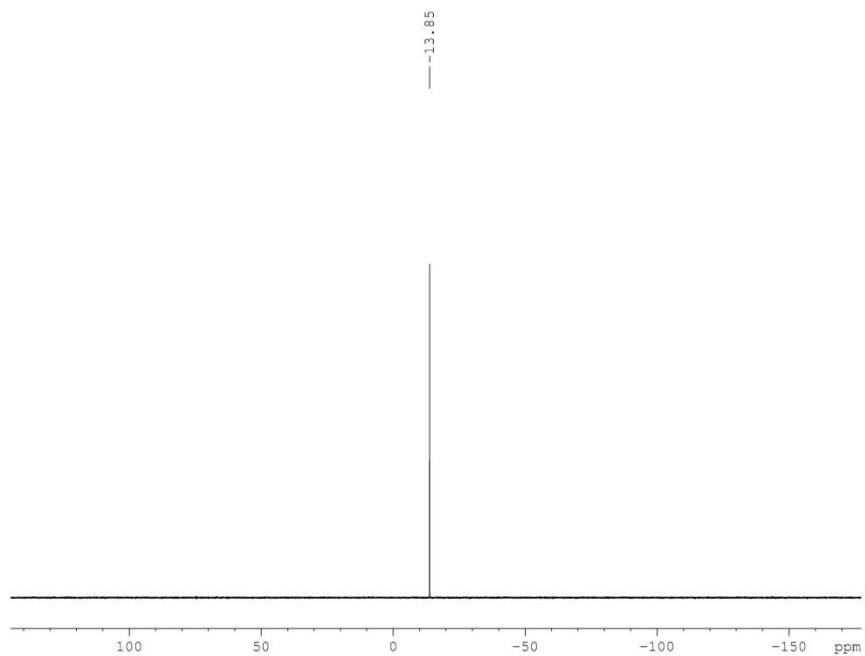

**Figure S32.**  $^{31}\text{P}$  NMR spectrum of compound **15**

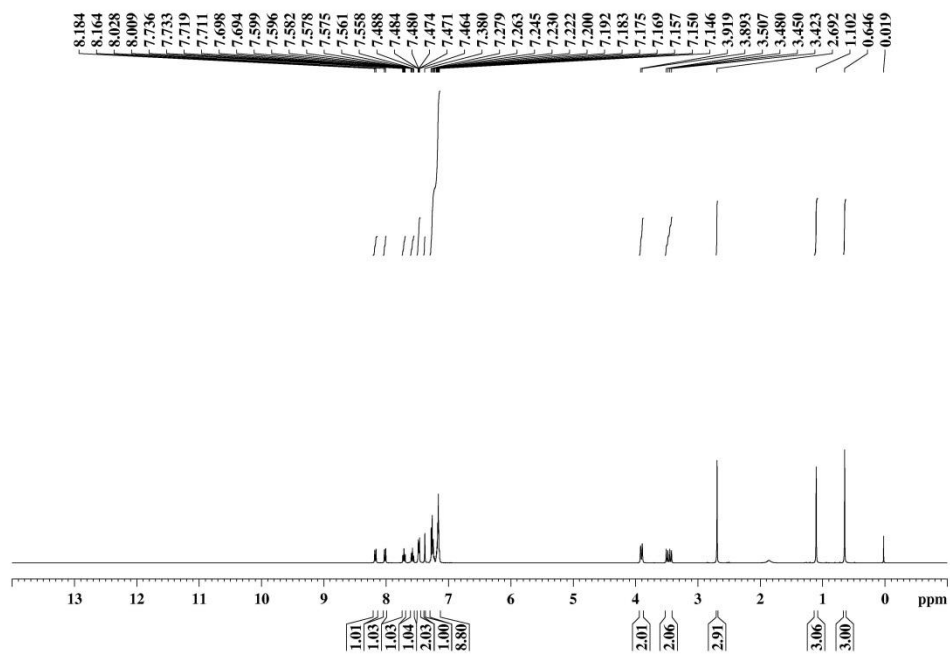

**Figure S33.**  $^1\text{H}$  NMR spectrum of compound **15**

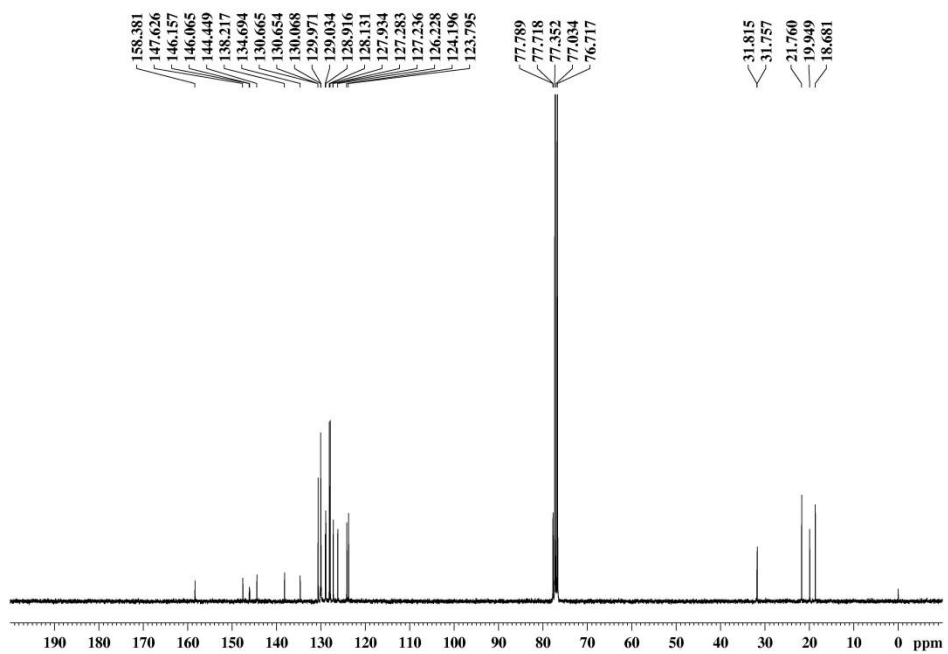

Figure S34.  $^{13}\text{C}$  NMR spectrum of compound 15

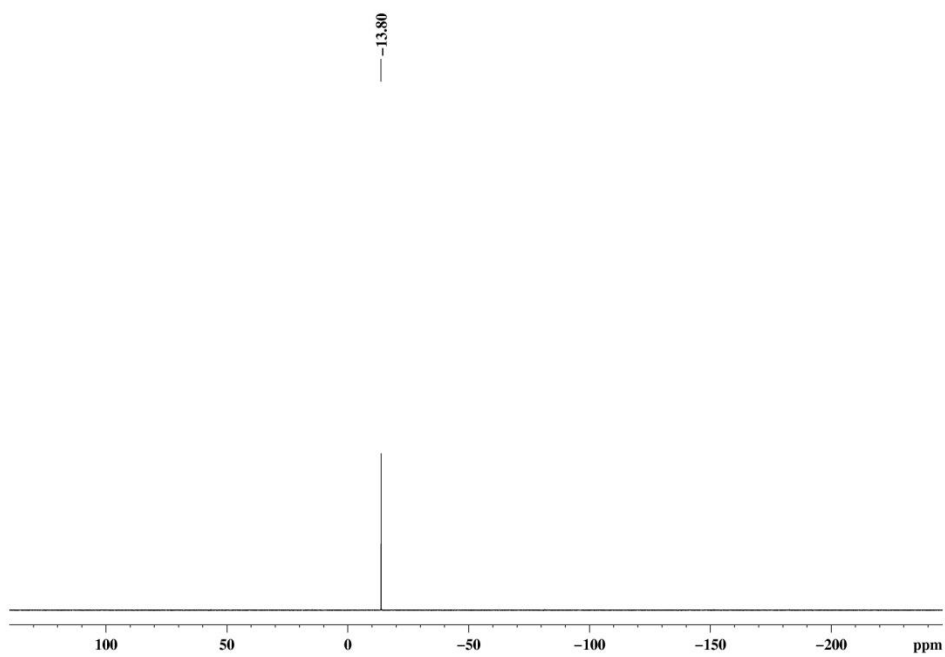

Figure S35.  $^{31}\text{P}$  NMR spectrum of compound 16

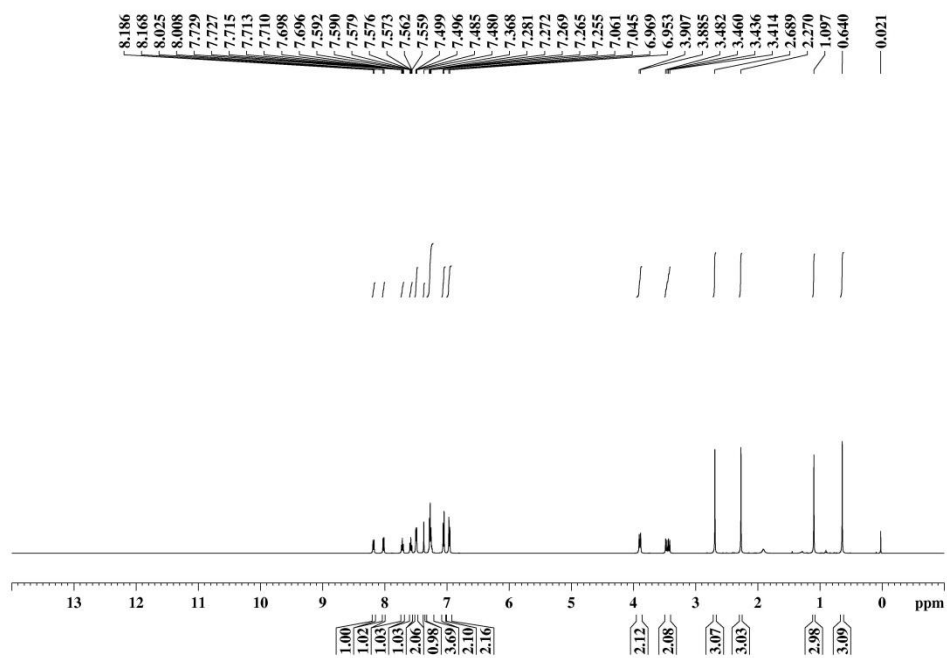

Figure S36.  $^1\text{H}$  NMR spectrum of compound **16**

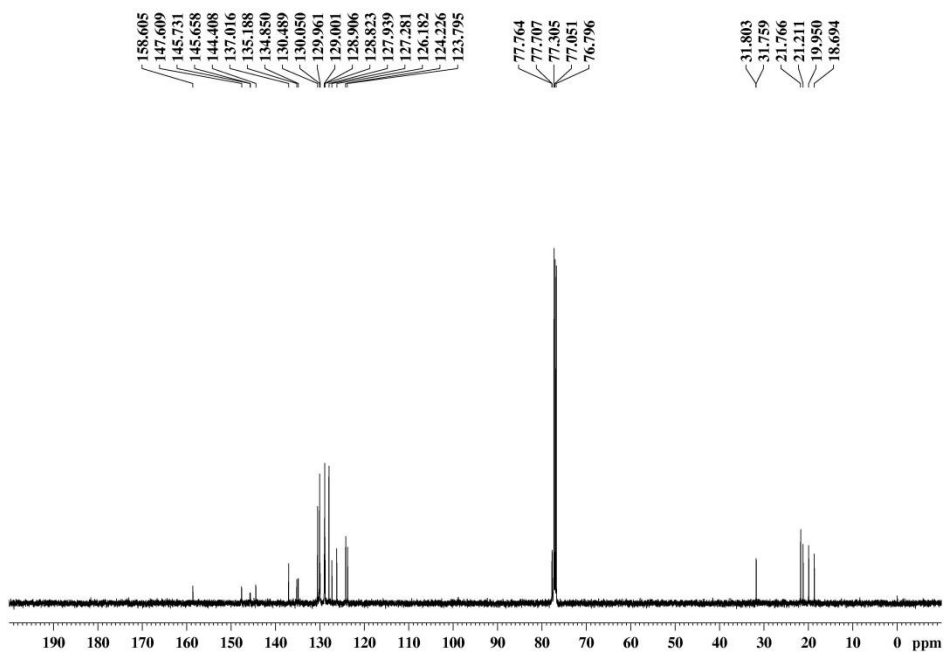

Figure S37.  $^{13}\text{C}$  NMR spectrum of compound **16**

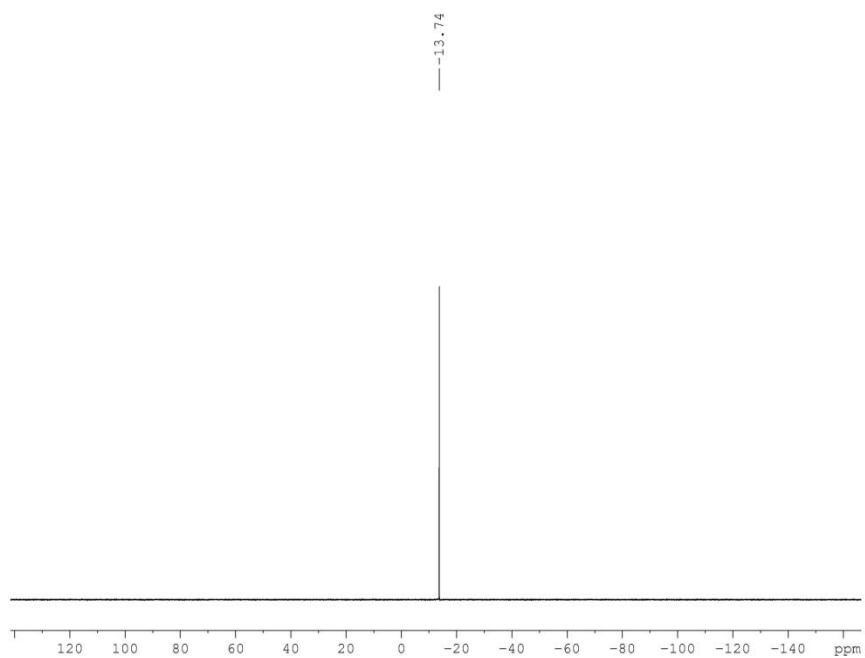

**Figure S38.**  $^{31}\text{P}$  NMR spectrum of compound **17**

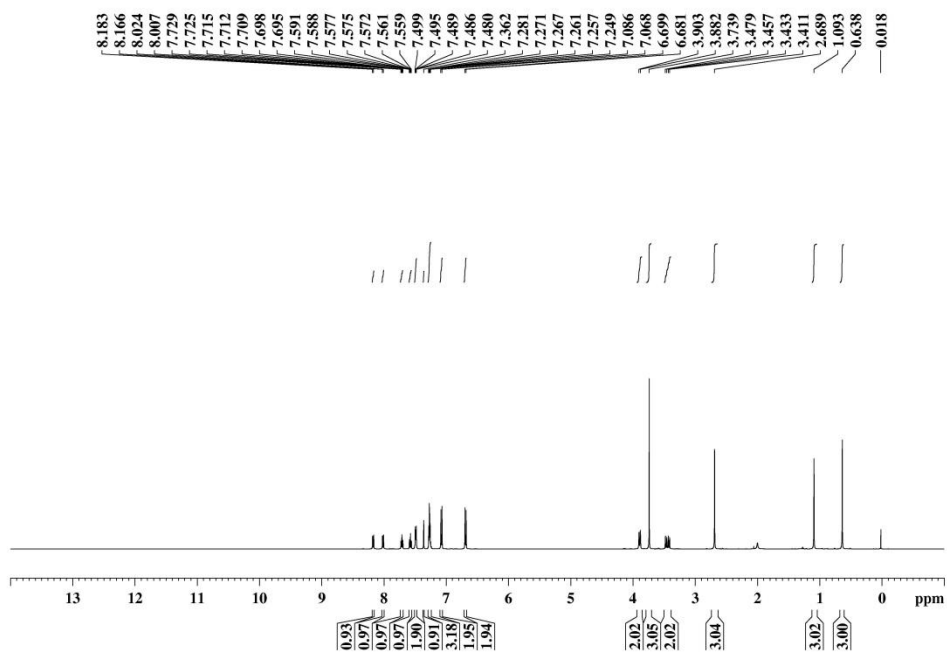

**Figure S39.**  $^1\text{H}$  NMR spectrum of compound **17**



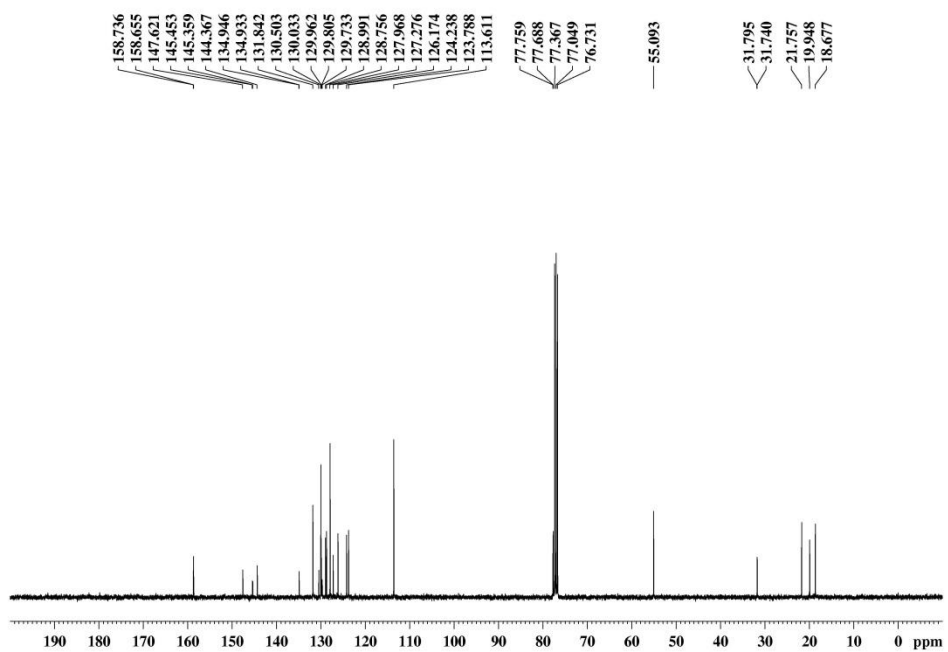

Figure S40.  $^{13}\text{C}$  NMR spectrum of compound 17

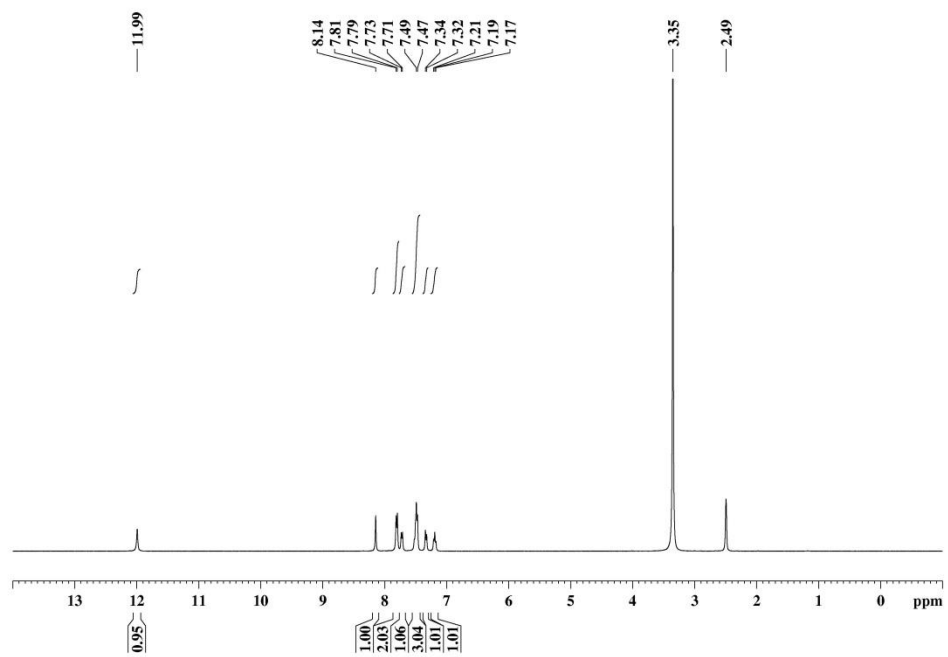

Figure S41.  $^1\text{H}$  NMR spectrum of compound 19

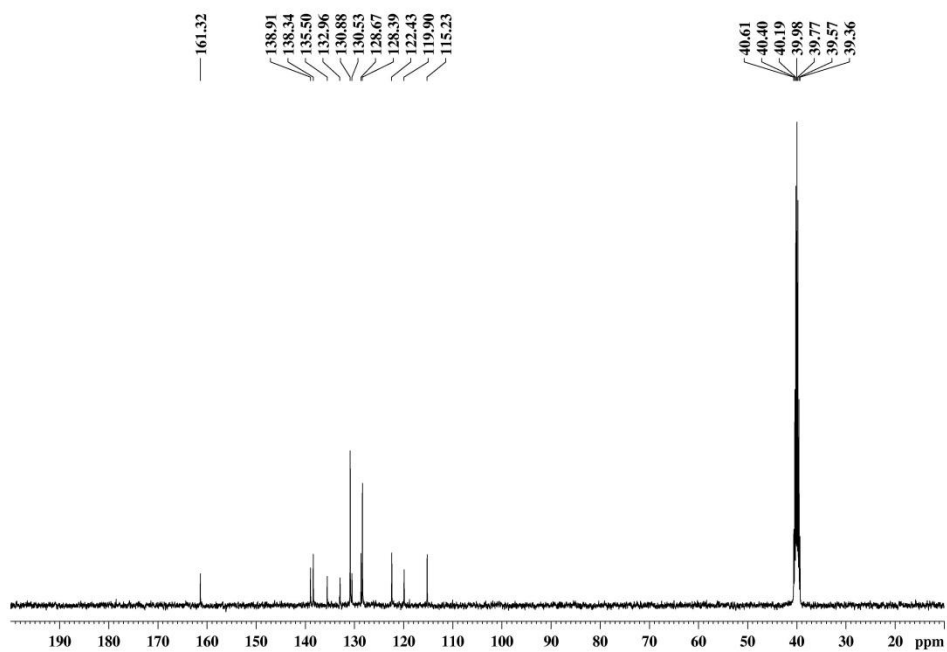

Figure S42.  $^{13}\text{C}$  NMR spectrum of compound **19**

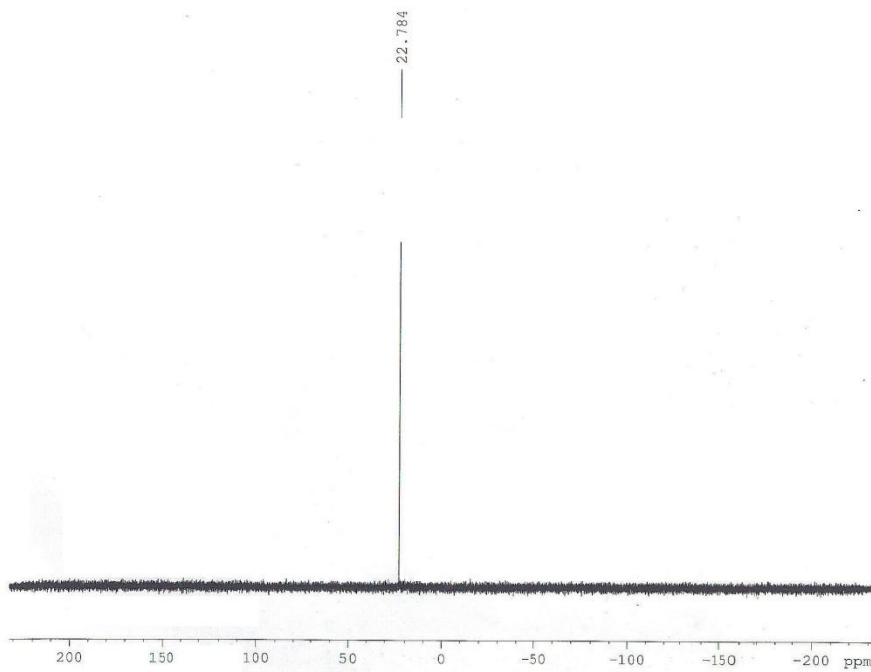

Figure S43.  $^{31}\text{P}$  NMR spectrum of compound **21**

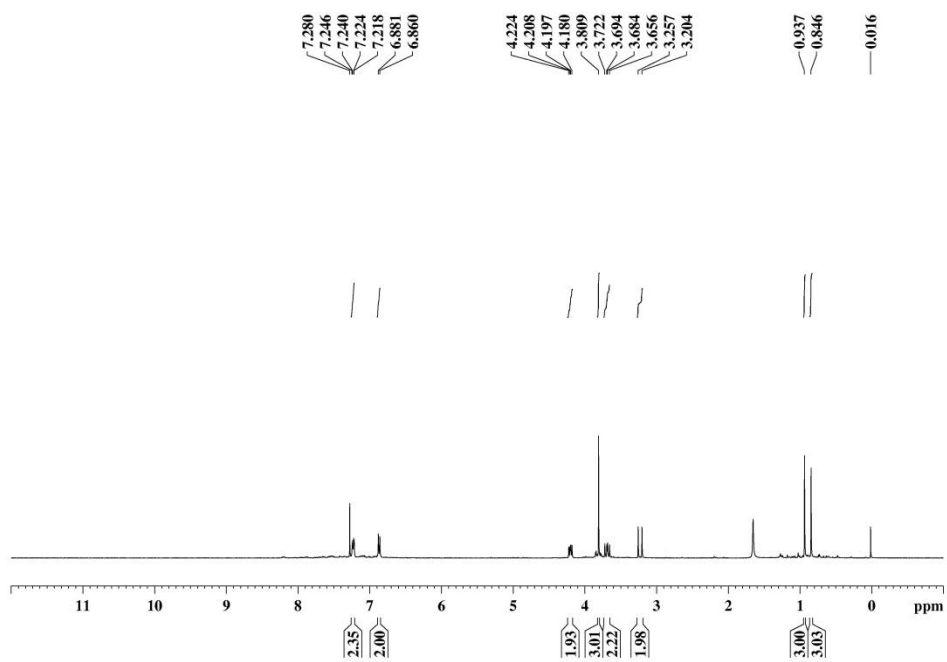

Figure S44.  $^1\text{H}$  NMR spectrum of compound **21**

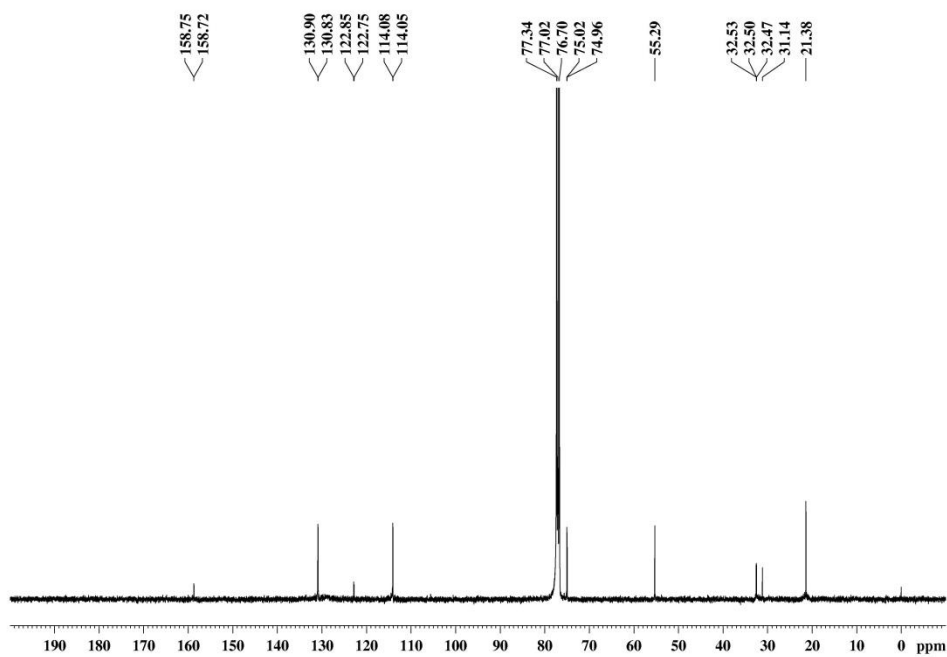

Figure S45.  $^{13}\text{C}$  NMR spectrum of compound **21**

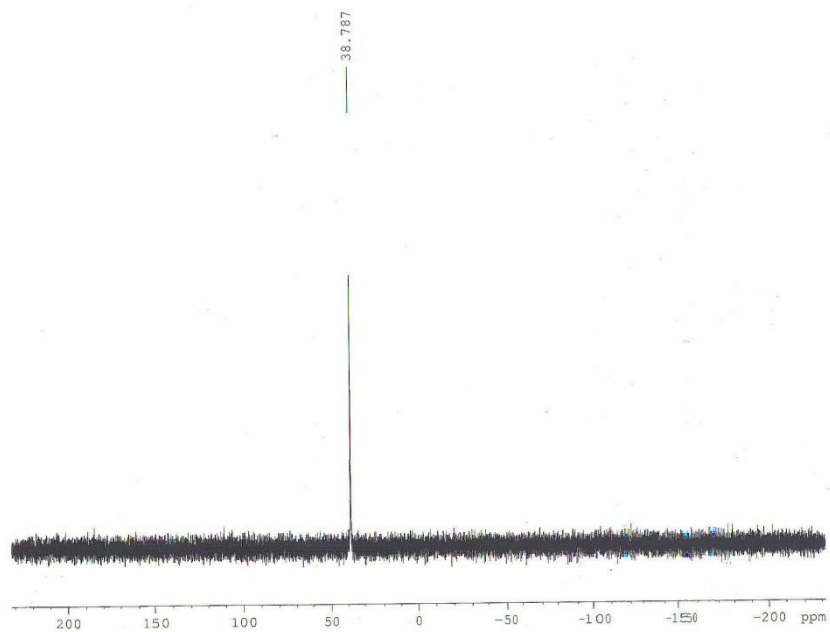

Figure S46.  $^{31}\text{P}$  NMR spectrum of compound **22**

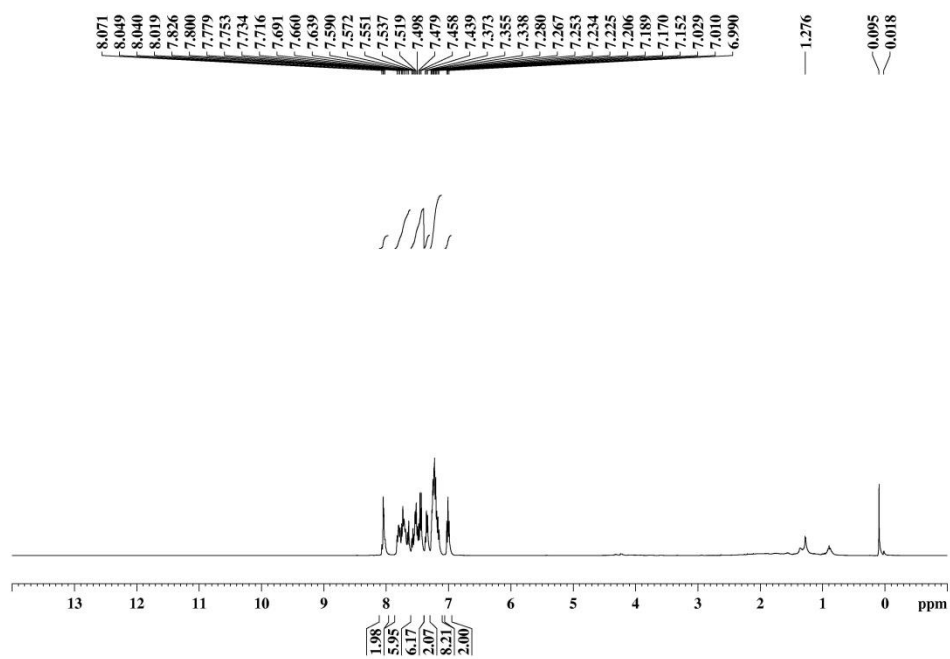

Figure S47.  $^1\text{H}$  NMR spectrum of compound **22**

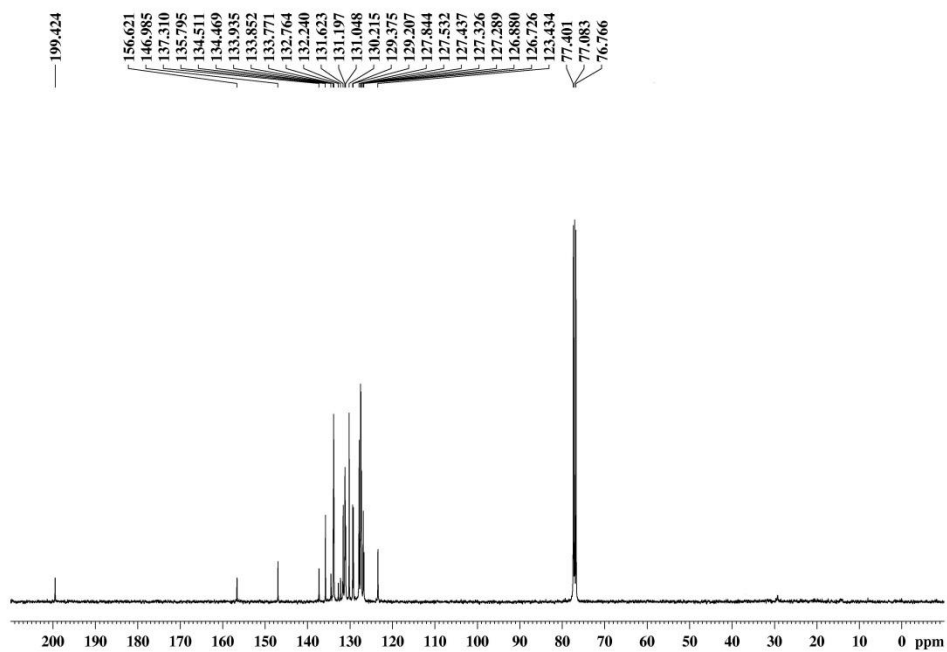

Figure S48. <sup>13</sup>C NMR spectrum of compound 22

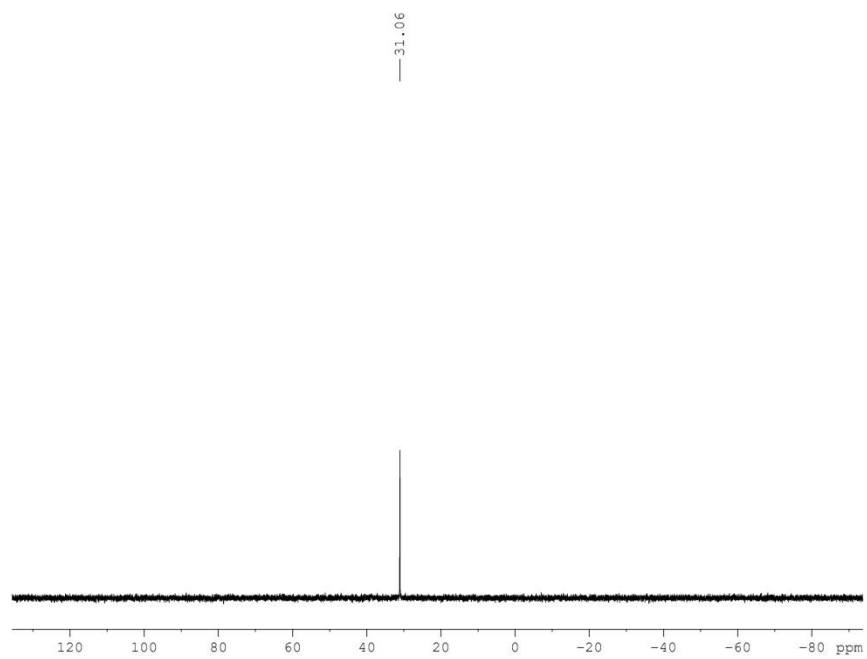

Figure S49. <sup>31</sup>P NMR spectrum of compound 23

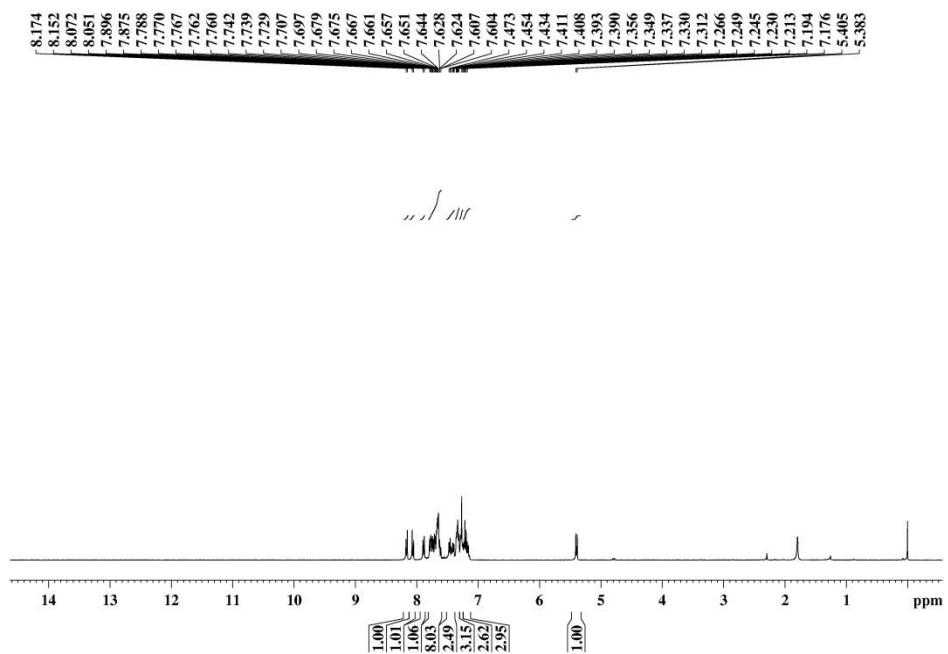

Figure S50.  $^1\text{H}$  NMR spectrum of compound **23**

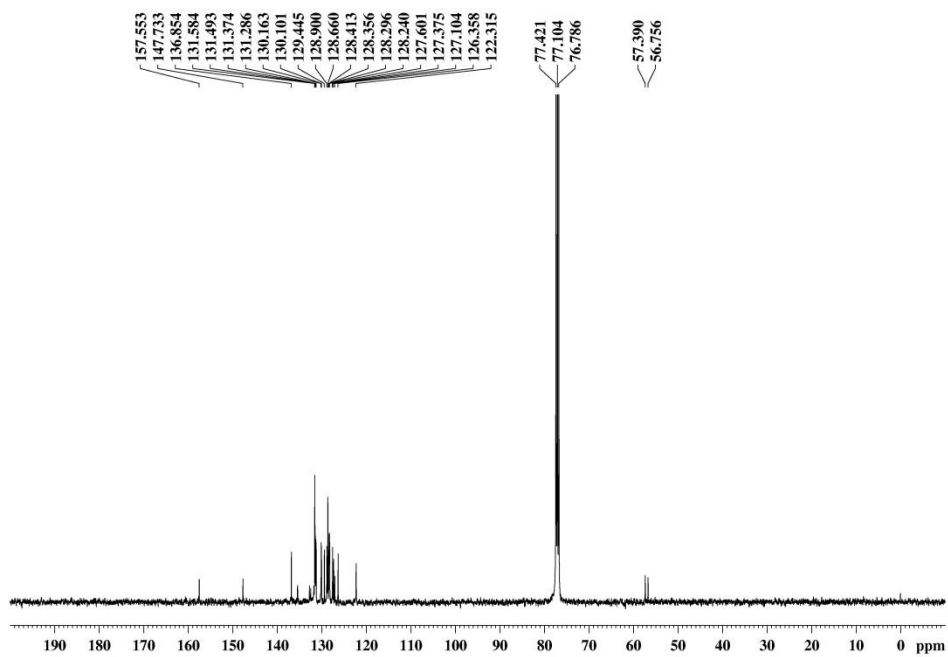

Figure S51.  $^{13}\text{C}$  NMR spectrum of compound **23**

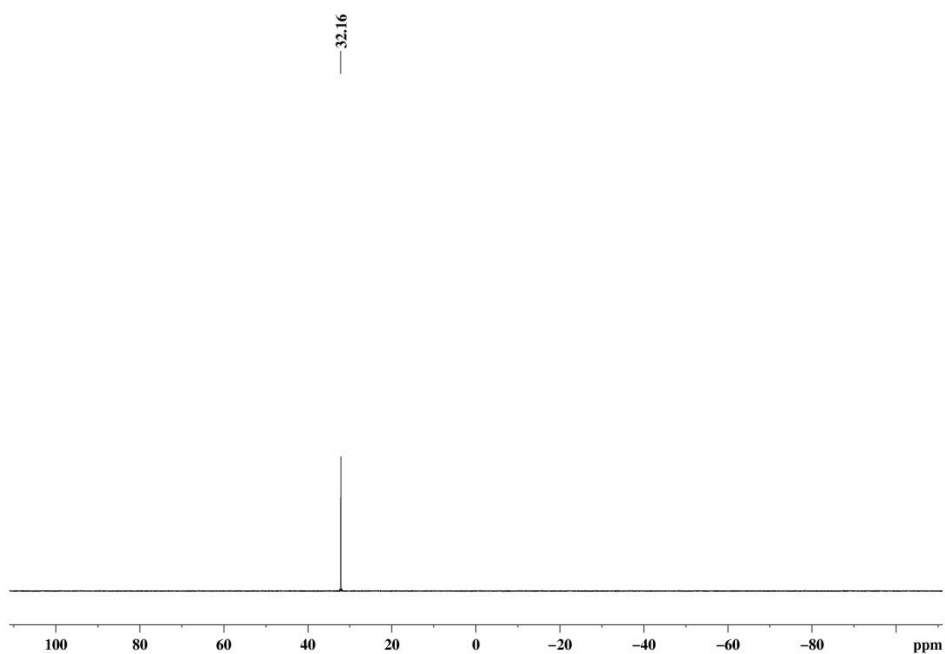

Figure S52.  $^{31}\text{P}$  NMR spectrum of compound **24**

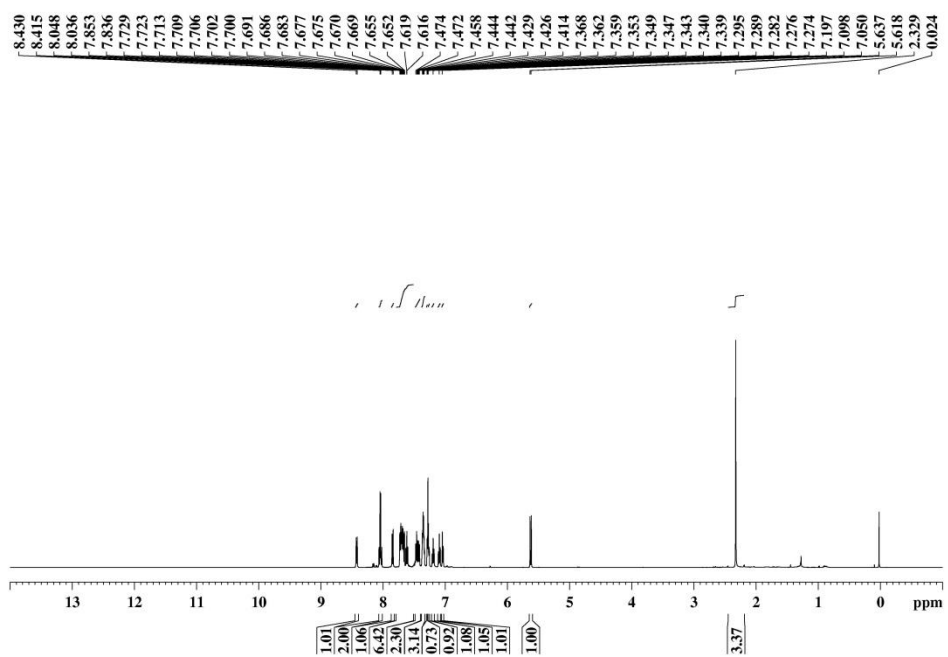

Figure S53.  $^1\text{H}$  NMR spectrum of compound **24**

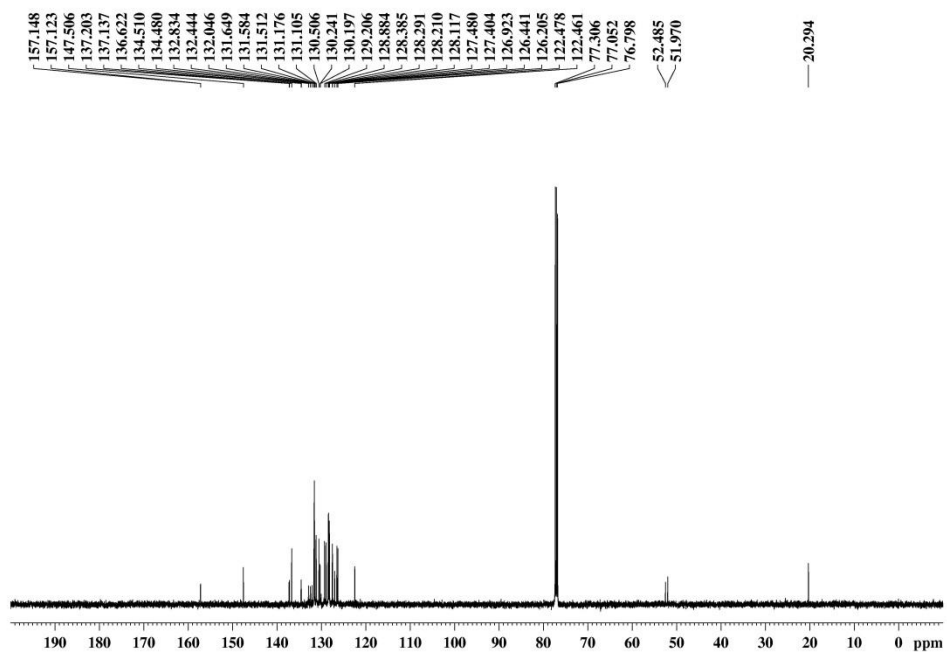

Figure S54.  $^{13}\text{C}$  NMR spectrum of compound 24

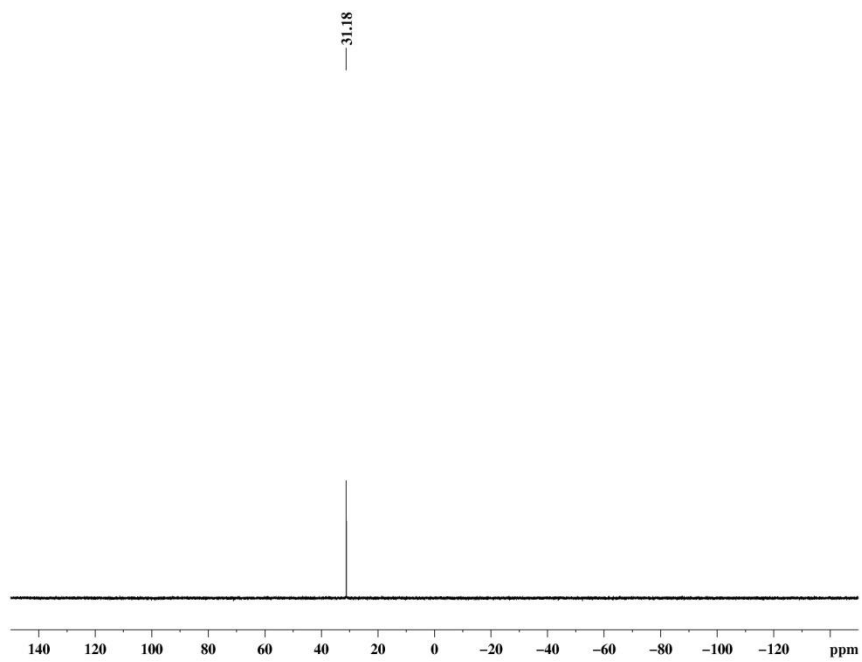

Figure S55.  $^{31}\text{P}$  NMR spectrum of compound 25



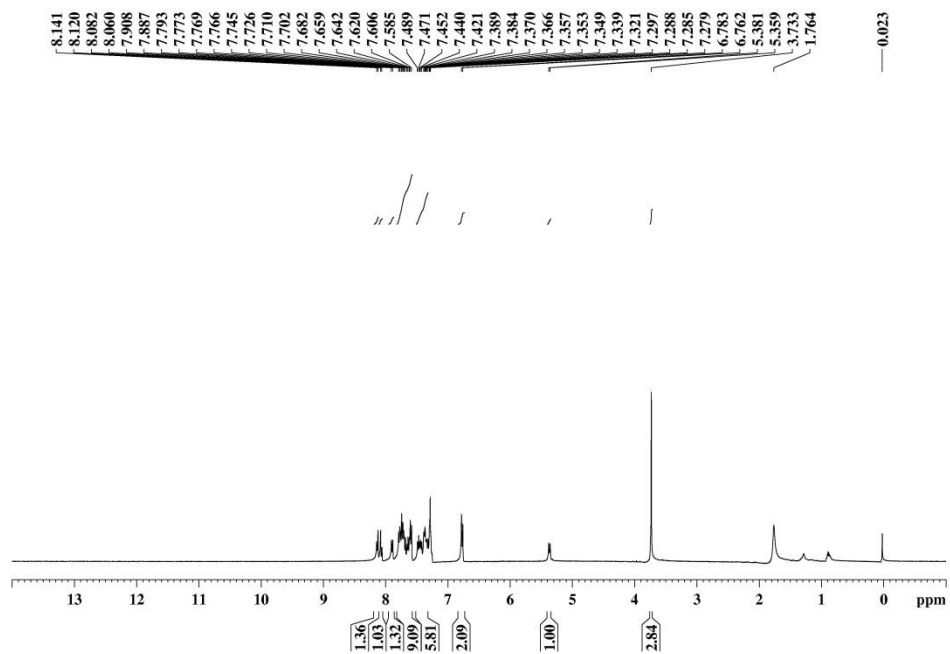

Figure S56.  $^1\text{H}$  NMR spectrum of compound **25**

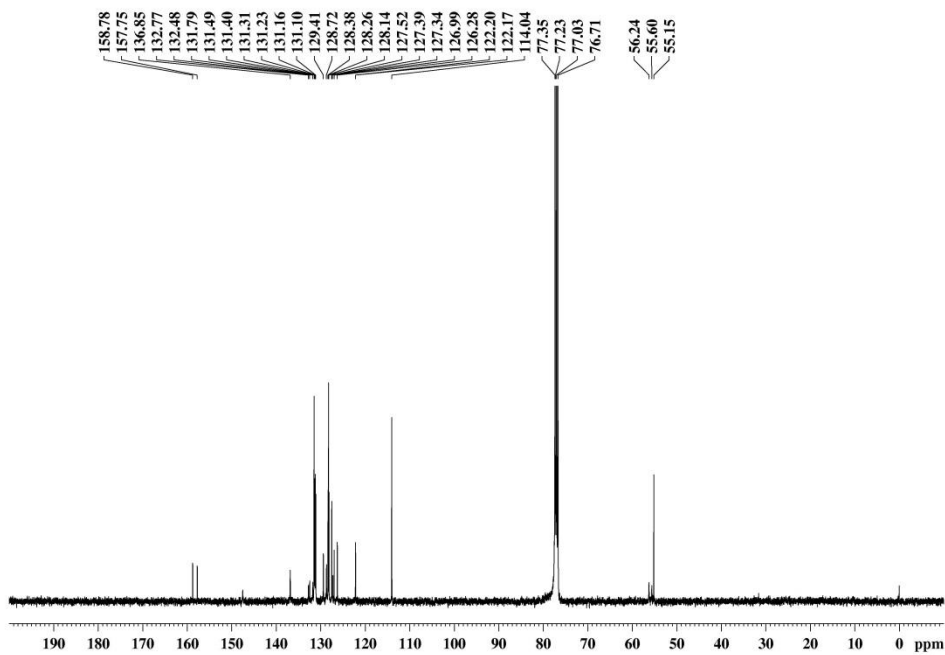

Figure S57.  $^{13}\text{C}$  NMR spectrum of compound **25**

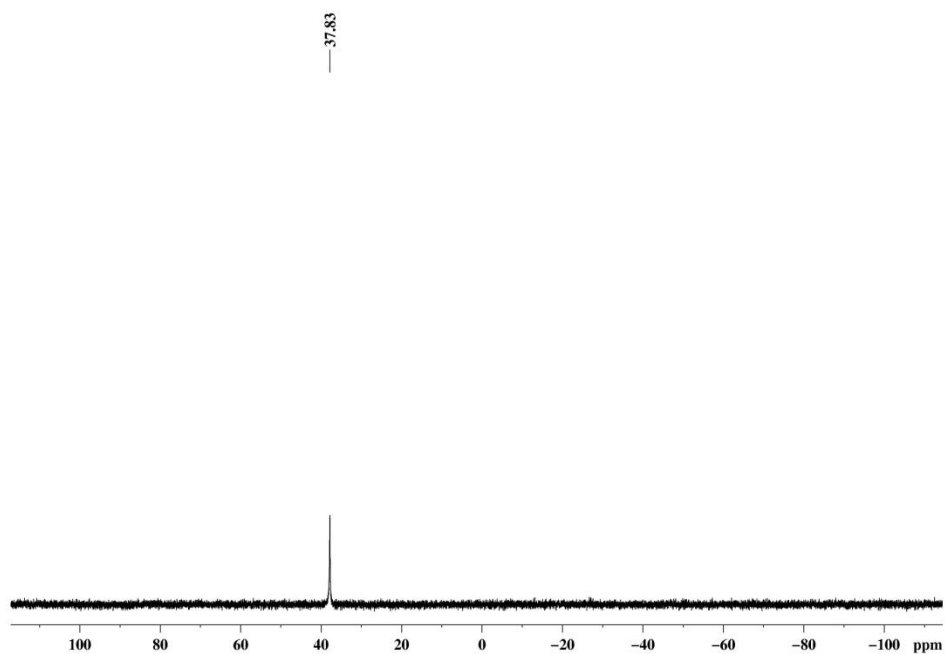

Figure S58.  $^{31}\text{P}$  NMR spectrum of compound **26**

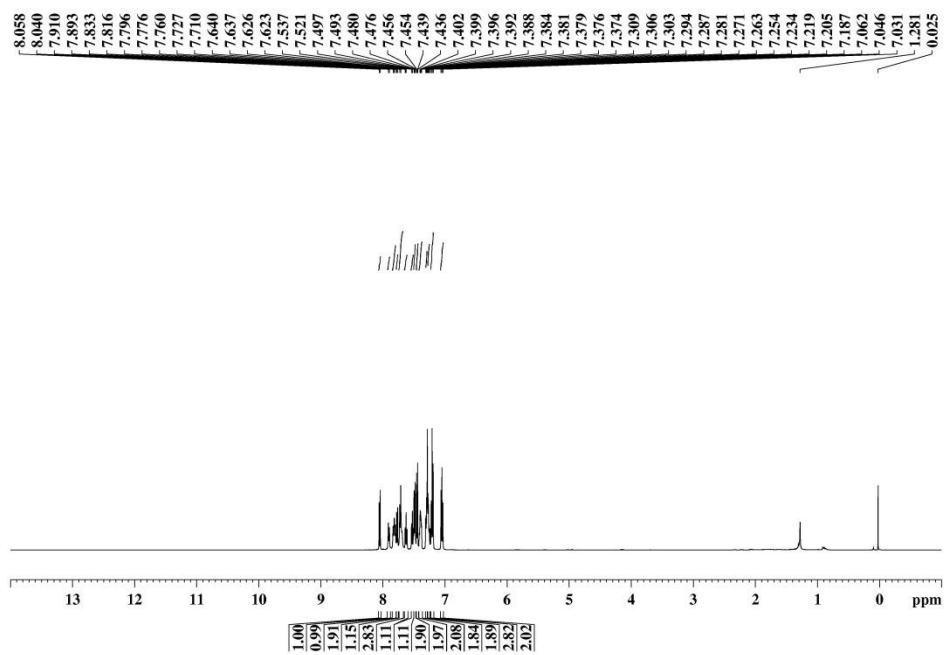

Figure S59.  $^1\text{H}$  NMR spectrum of compound **26**

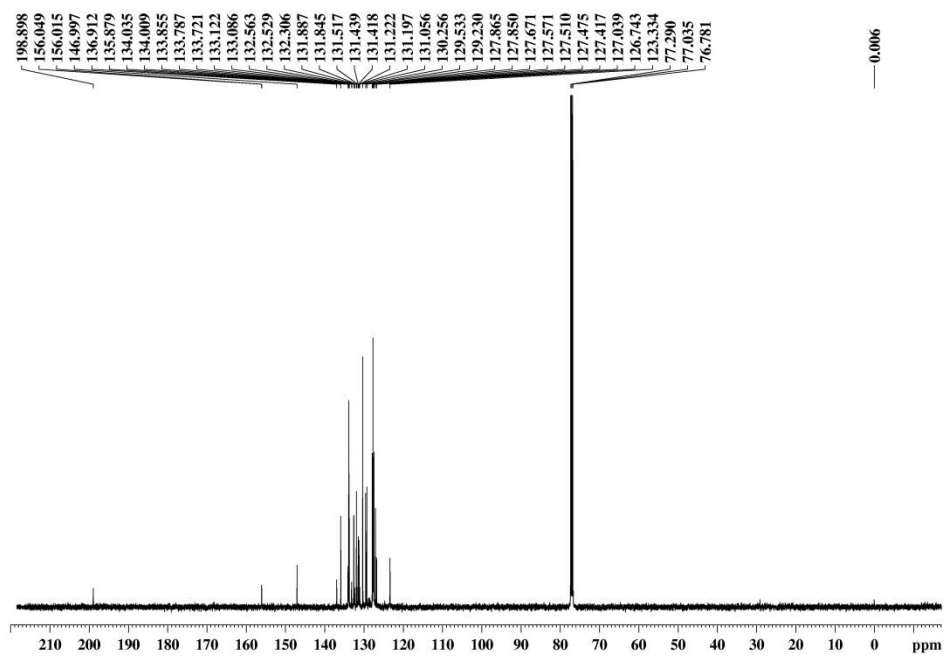

Figure S60.  $^{13}\text{C}$  NMR spectrum of compound 26

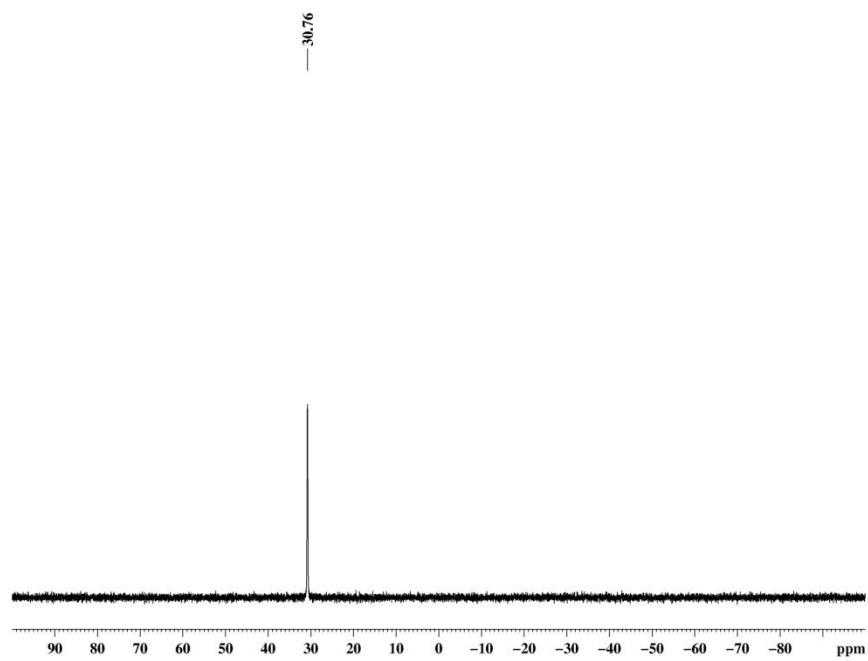

Figure S61.  $^{31}\text{P}$  NMR spectrum of compound 27

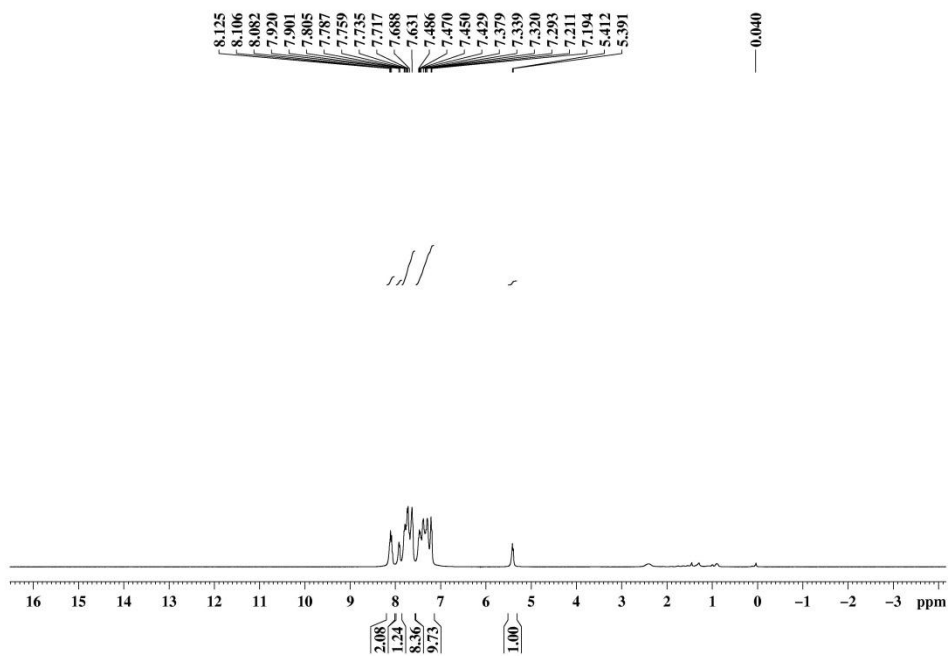

Figure S62.  $^1\text{H}$  NMR spectrum of compound **27**

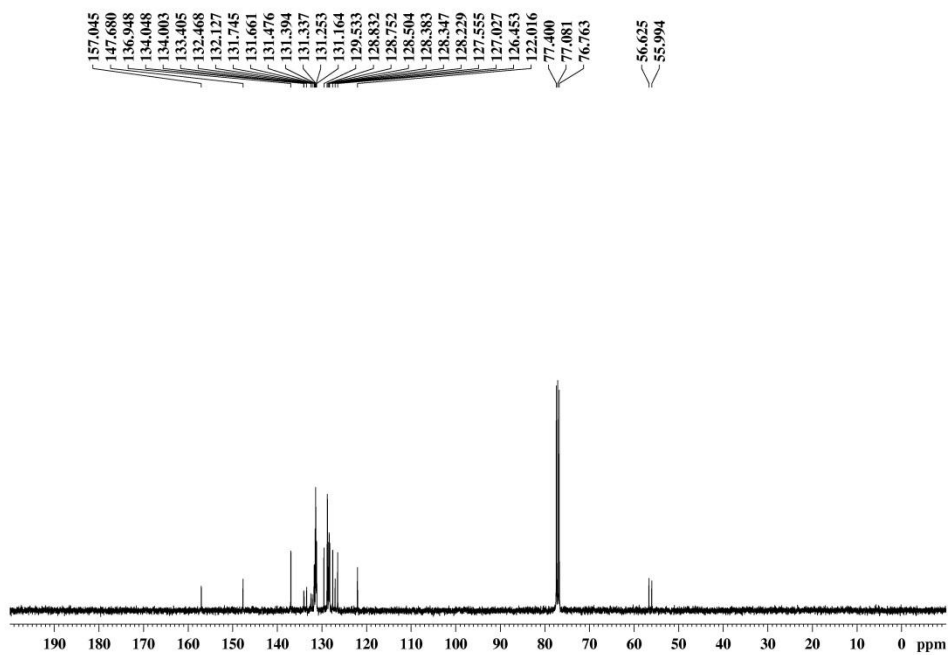

Figure S63.  $^{13}\text{C}$  NMR spectrum of compound **27**

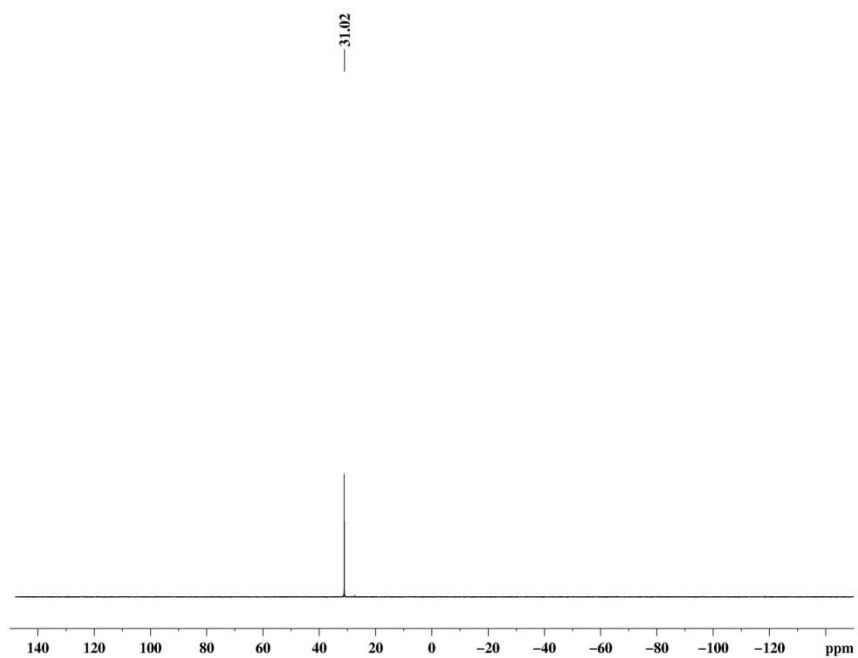

Figure S64.  $^{31}\text{P}$  NMR spectrum of compound **28**

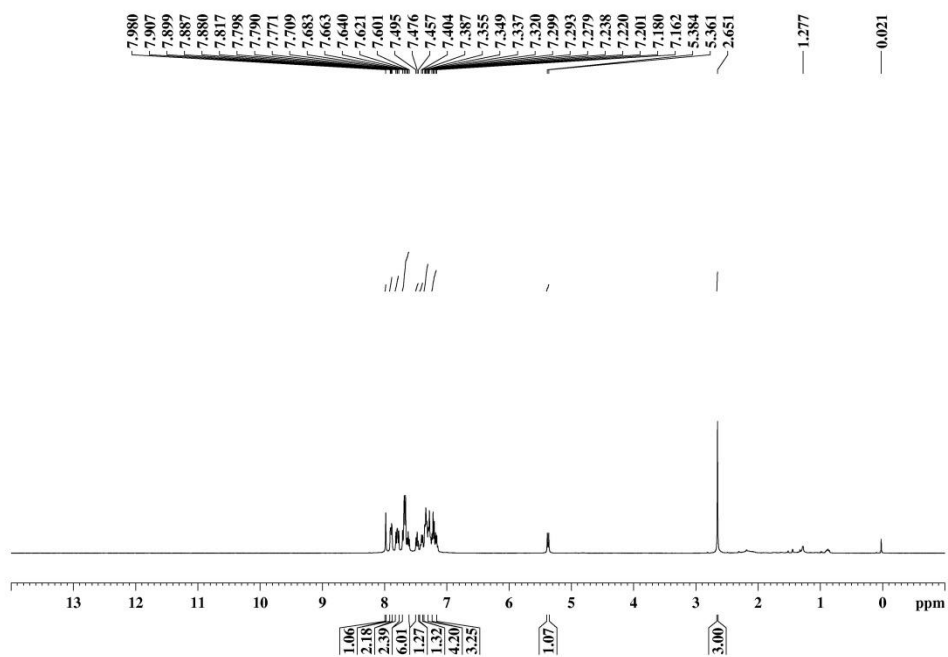

Figure S65.  $^1\text{H}$  NMR spectrum of compound **28**

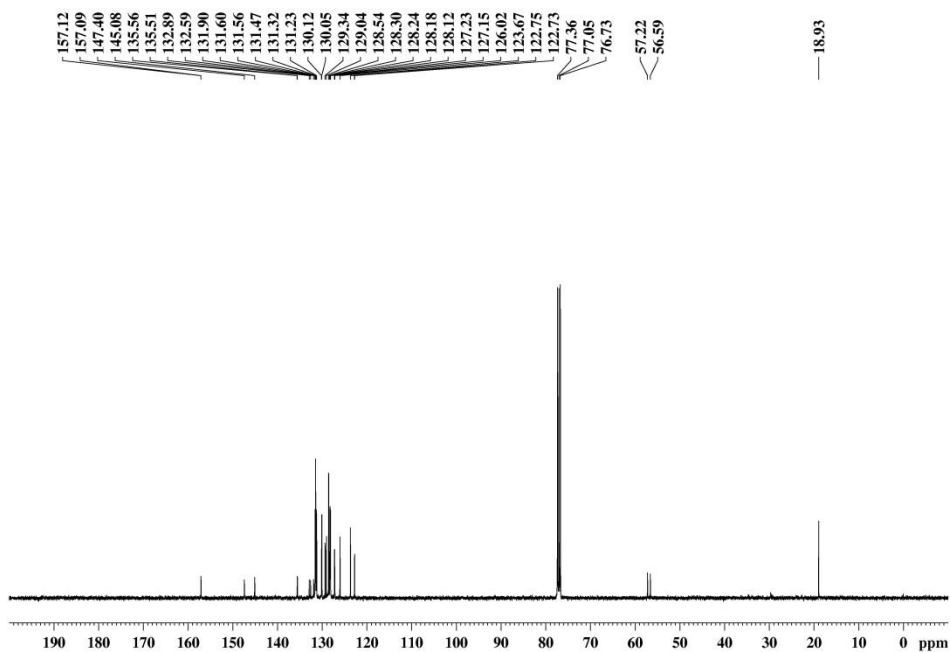

Figure S66.  $^{13}\text{C}$  NMR spectrum of compound 28

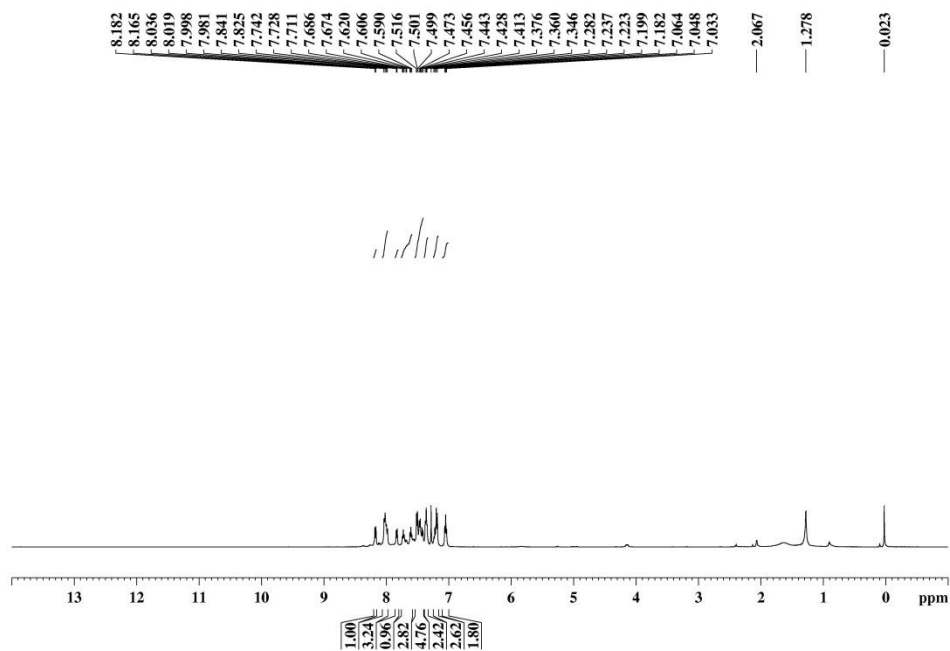

Figure S67.  $^1\text{H}$  NMR spectrum of compound 29

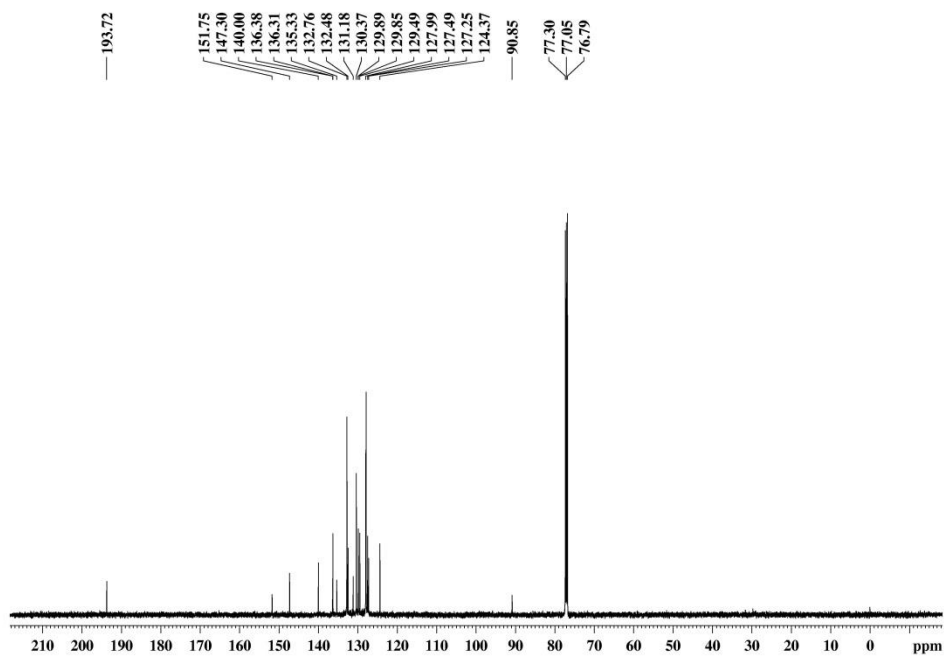

Figure S68.  $^{13}\text{C}$  NMR spectrum of compound **29**

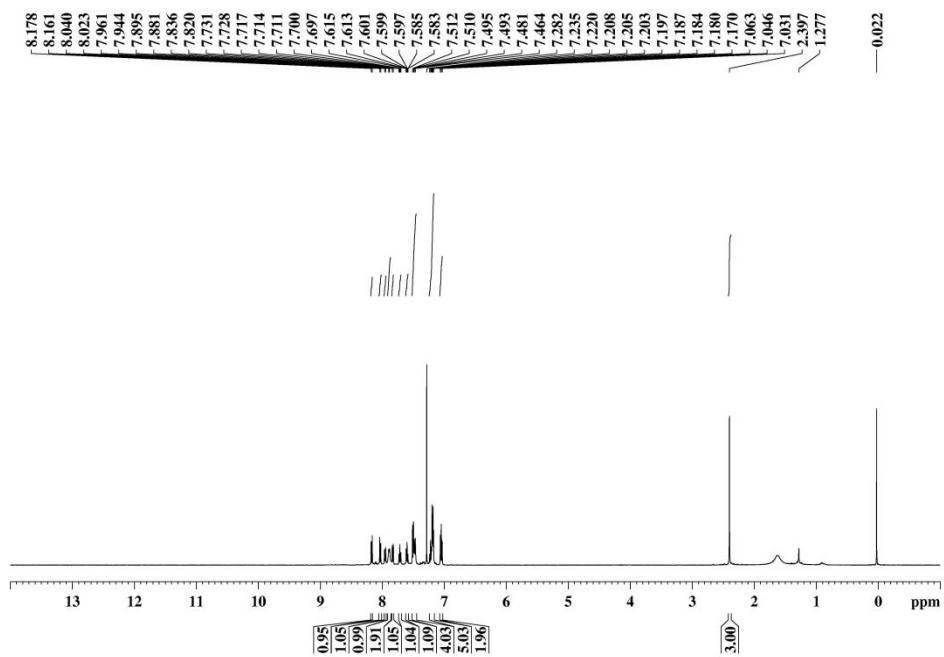

Figure S69.  $^1\text{H}$  NMR spectrum of compound **30**





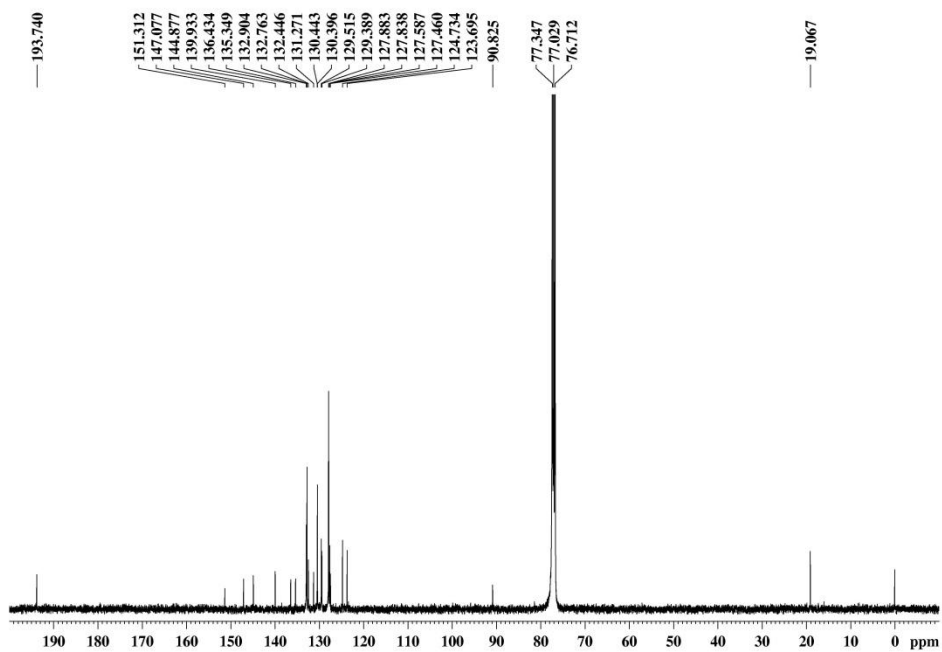

Figure S72.  $^{13}\text{C}$  NMR spectrum of compound 31

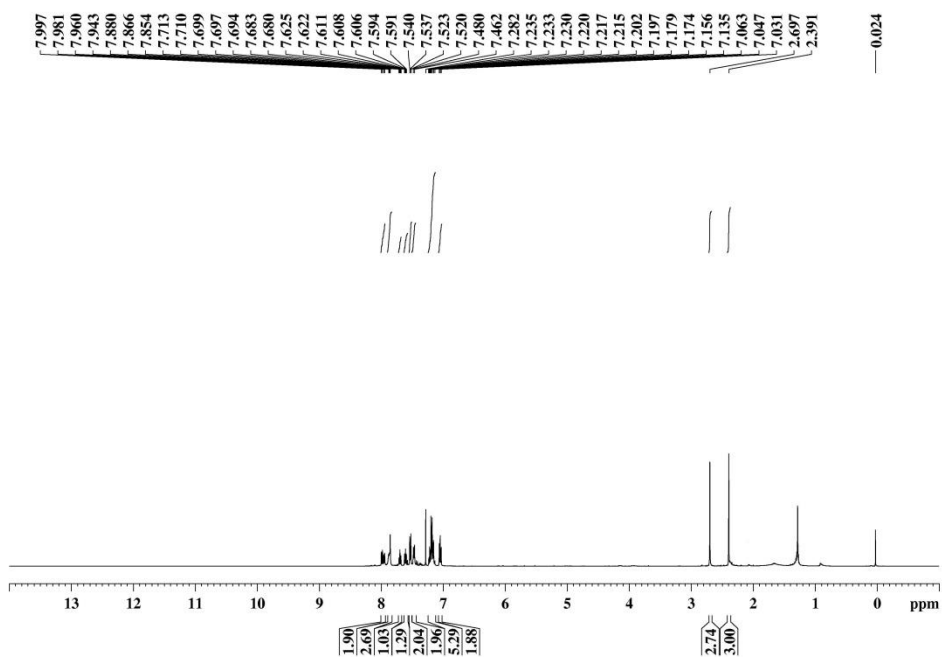

Figure S73.  $^1\text{H}$  NMR spectrum of compound 32

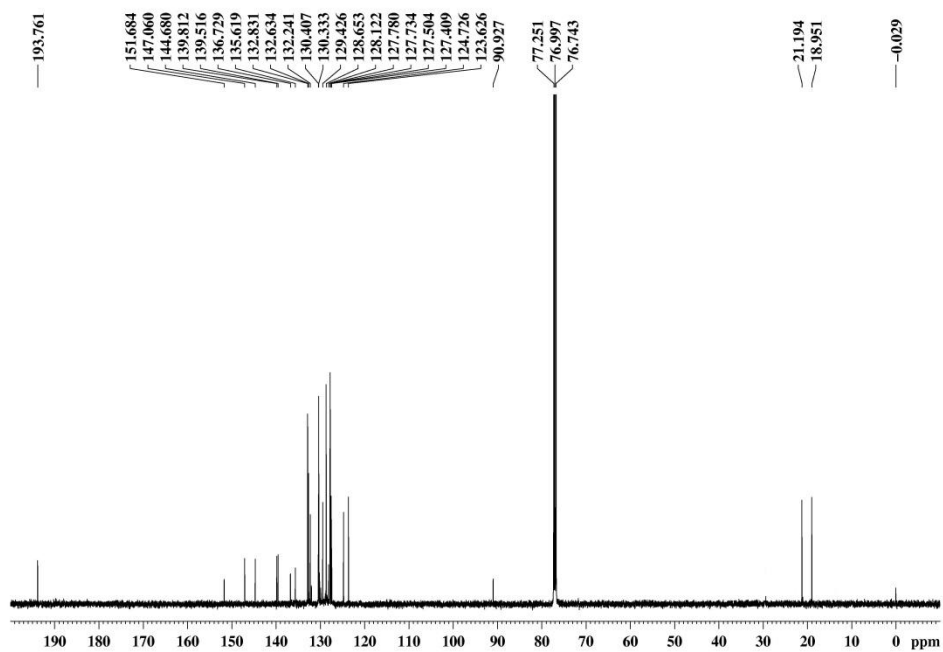

Figure S74.  $^{13}\text{C}$  NMR spectrum of compound 32

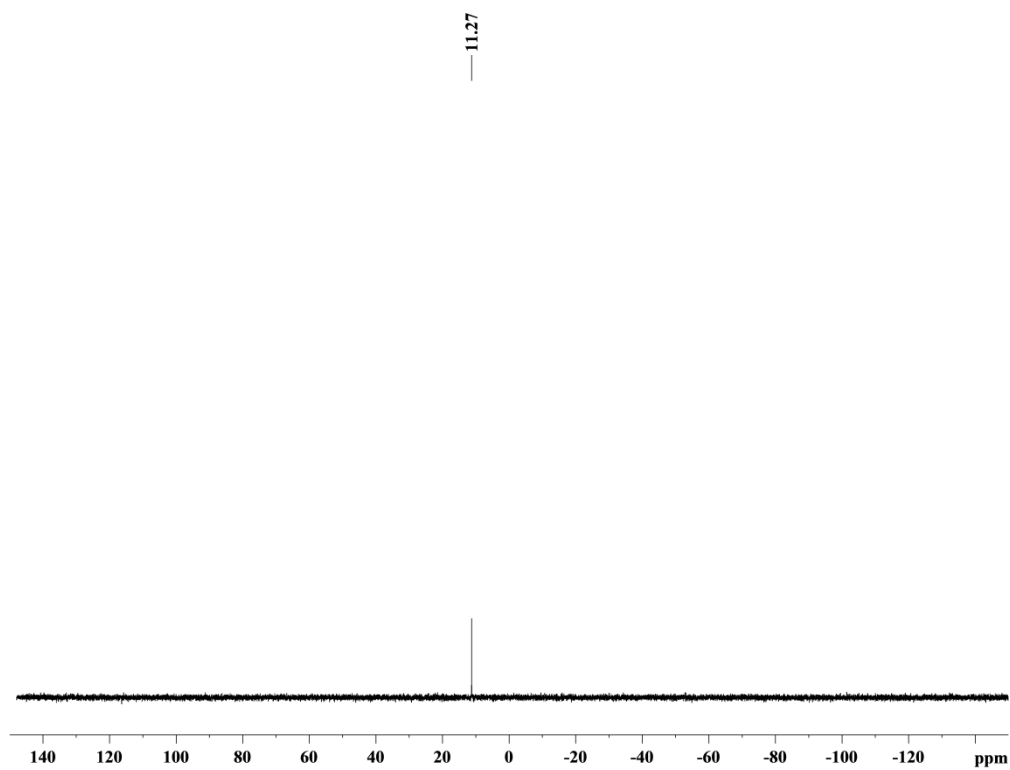

Figure S75.  $^{31}\text{P}$  NMR spectrum of compound 33

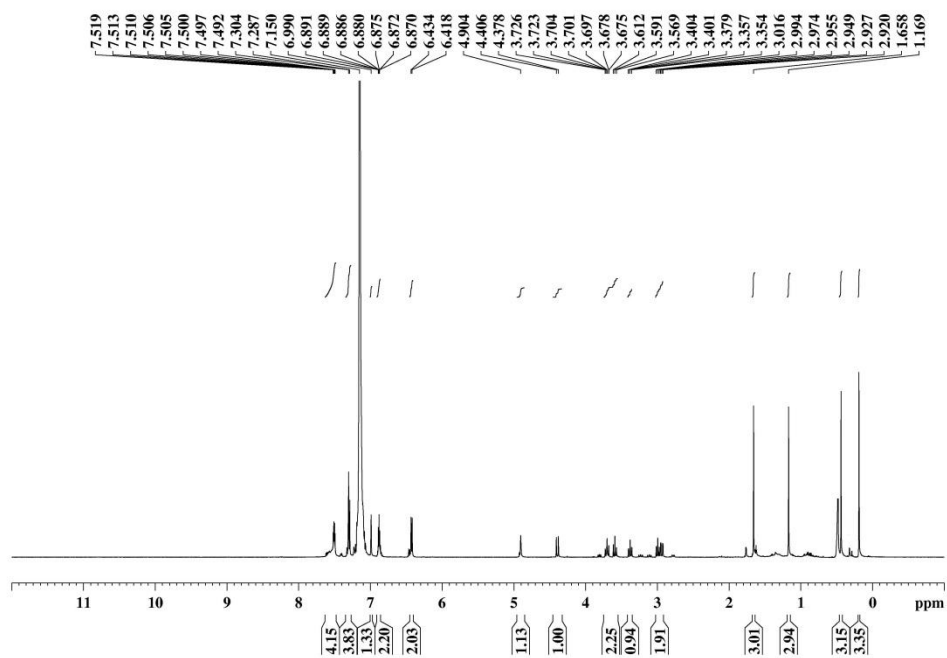

Figure S76.  $^1\text{H}$  NMR spectrum of compound **33** in  $\text{C}_6\text{D}_6$  (see text)

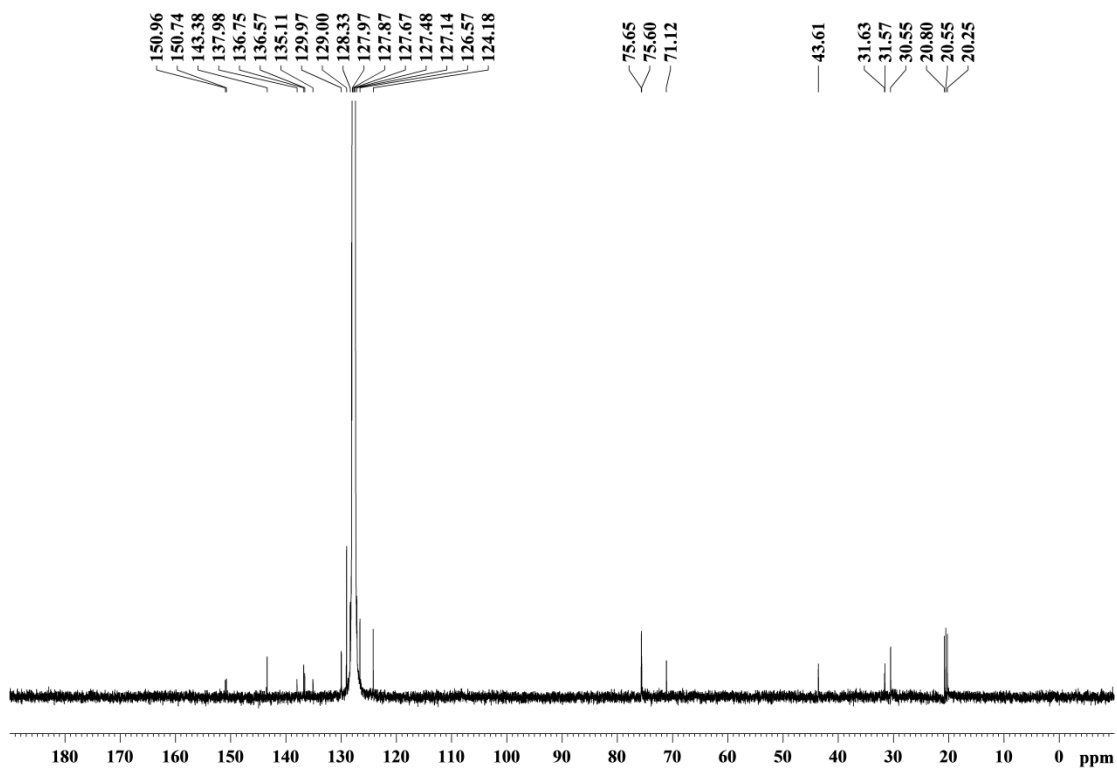

Figure S77.  $^{13}\text{C}$  NMR spectrum of compound **33** in  $\text{C}_6\text{D}_6$  (see text)
